# Supplementary material for: Cationic iridium-catalyzed C–H alkylation of 2-substituted pyridine N-oxides with acrylates
Source: Royal Society of Chemistry journal article supplement (doi:10.1039/c4qo00355a), 2015-01-01

## Supporting Information

### Cationic Iridium-Catalyzed C-H Alkylation of 2-Substituted Pyridine N-Oxides with Acrylates

Takanori Shibata<sup>a,b,\*</sup> and Hideaki Takano<sup>a</sup>

<sup>a</sup> Department of Chemistry and Biochemistry, School of Advanced Science and Engineering, Waseda University,  
Tokyo, 169-8050, Japan

<sup>b</sup> JST, ACT-C, 4-1-8 Honcho, Kawaguchi, Saitama 332-0012, Japan

*E-mail: tshibata@waseda.jp*

|                                                                              |    |
|------------------------------------------------------------------------------|----|
| 1) Experimental details and characterization data for new compounds.....     | S2 |
| 2) References.....                                                           | S7 |
| 3) <sup>1</sup> H NMR and <sup>13</sup> C NMR spectra for new compounds..... | S8 |

## 1) Experimental details and characterization data for new compounds

### General information

Unless otherwise noted, all materials were purchased from commercial suppliers and used as received. Anhydrous solvents were stocked on activated molecular sieves 4A under argon atmosphere, and degassed by argon bubbling prior to use. All reactions were carried out under argon atmosphere in oven-dried glassware with a magnetic stirring bar.

<sup>1</sup>H NMR spectra were recorded on JEOL AL-400 (400 MHz) spectrometers. The chemical shifts were reported in parts per million ( $\delta$ ) relative to internal standard TMS (0 ppm) for CDCl<sub>3</sub>. The peak patterns are indicated as follows: s, singlet; d, doublet; dd, doublet of doublet; t, triplet; q, quartet; m, multiplet. The coupling constants, *J*, are reported in Hertz (Hz). <sup>13</sup>C NMR spectra were obtained by JEOL AL-400 (100 MHz) spectrometers and referenced to the internal solvent signals (central peak is 77.0 ppm in CDCl<sub>3</sub>). CDCl<sub>3</sub> was used as a NMR solvent. High-resolution mass spectra (HRMS) were measured on ESI (Electrospray ionization) method at a JEOL GC-mate II. Preparative thin-layer chromatography (PTLC) was performed with silica gel-precoated glass plates (Merck 60 GF254) prepared in our laboratory. Flash column chromatography was performed over silica gel 200-300.

*N*-Oxides **1a**,<sup>1</sup> **1b**,<sup>2</sup> **1c**,<sup>2</sup> **1d**,<sup>3</sup> **1e**,<sup>1</sup> **1f**,<sup>1</sup> and **1h**<sup>4</sup> were prepared by the oxidation of the corresponding 2-substituted pyridines using mCPBA and their physical properties were accorded with those with literatures. *N*-Oxides **1g** and **1i** were commercially available (TCI, Japan).

### Typical Experimental Procedure

[Ir(cod)<sub>2</sub>]BARF (0.02 mmol), *rac*-BINAP (0.02 mmol), and pyridine *N*-oxide **1** (0.20 mmol), were placed in a screw-capped Schlenk tube, which was then evacuated and backfilled with argon (x3). To the reaction vessel was added anhydrous chlorobenzene (1.0 mL, pretreated by argon bubbling for 30 sec). The solution was then stirred at 120 °C (bath temperature) for 24 h or 48 h. The reaction mixture was cooled to room temperature and the solvent was evaporated to dryness. The obtained crude products were purified by thin-layer chromatography to give analytically pure product **3**.

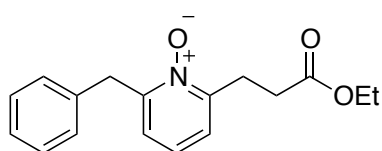

### 2-(3-Ethoxy-3-oxopropyl)-6-(phenylmethyl)pyridine *N*-oxide (**3a**).

Isolated by thin-layer chromatography (dichloromethane/acetone = 10/1, *R<sub>f</sub>* = 0.50). The title compound was obtained as white yellow oil (88 %). <sup>1</sup>H NMR (ppm)  $\delta$  7.37-7.33 (m, 2H), 7.30-7.26 (m, 3H), 7.20 (dd, *J* = 7.8, 2.0 Hz, 1H), 7.05 (t, *J* = 7.8 Hz, 1H), 6.83 (dd, *J* = 7.8, 2.0 Hz, 1H), 4.26 (s, 2H), 4.12 (q, *J* = 7.2 Hz, 2H), 3.25 (t, *J* = 7.1 Hz, 2H), 2.86 (t, *J* = 7.1 Hz, 2H), 1.23 (t, *J* = 7.2 Hz, 3H); <sup>13</sup>C NMR (ppm)  $\delta$  172.7, 151.9, 150.3, 136.6, 129.7, 128.8, 126.9, 124.5, 123.9, 123.7, 60.5, 36.9, 30.3, 27.0, 14.2; IR (cm<sup>-1</sup>) 2980, 1731, 1247, 1185, 1161, 851, 768, 702; HRMS(ESI) calcd for C<sub>17</sub>H<sub>19</sub>NNaO<sub>3</sub> (M<sup>+</sup>+Na): 308.1257; found: 308.1256.

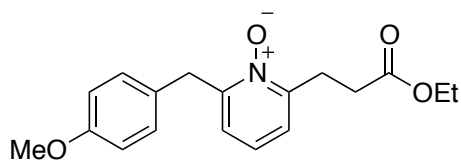

**2-(3-Ethoxy-3-oxopropyl)-6-[(4-methoxyphenyl)methyl]pyridine *N*-oxide (3b).**

Isolated by thin-layer chromatography (dichloromethane/acetone = 10/1,  $R_f$  = 0.65). The title compound was obtained as white yellow oil (67 %).  $^1\text{H}$  NMR (ppm)  $\delta$  7.20-7.18 (m, 3H), 7.05 (dd,  $J$  = 7.9, 7.9 Hz, 1H), 6.89 (d,  $J$  = 8.7 Hz, 2H), 6.83 (dd,  $J$  = 7.9, 1.9 Hz, 1H), 4.19 (s, 2H), 4.12 (q,  $J$  = 7.2 Hz, 2H), 3.81 (s, 3H), 3.24 (t,  $J$  = 7.1 Hz, 2H), 2.86 (t,  $J$  = 7.1 Hz, 2H), 1.23 (t,  $J$  = 7.2 Hz, 3H);  $^{13}\text{C}$  NMR (ppm)  $\delta$  172.7, 158.6, 152.3, 150.2, 130.7, 128.5, 124.5, 123.8, 123.6, 114.2, 60.5, 55.3, 36.1, 30.3, 27.0, 14.2; IR ( $\text{cm}^{-1}$ ) 2933, 1731, 1512, 1247, 1179, 855, 786; HRMS(ESI) calcd for  $\text{C}_{18}\text{H}_{21}\text{NNaO}_4$  ( $\text{M}^+\text{+Na}$ ): 338.1363; found: 338.1362.

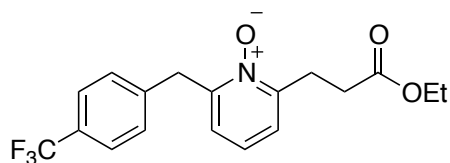

**2-(3-Ethoxy-3-oxopropyl)-6-[(4-trifluoromethylphenyl)methyl]pyridine *N*-oxide (3c).**

Isolated by thin-layer chromatography (dichloromethane/acetone = 10/1,  $R_f$  = 0.60). The title compound was obtained as white yellow solid (75 %). Mp: 59 °C;  $^1\text{H}$  NMR (ppm)  $\delta$  7.59 (d,  $J$  = 8.0 Hz, 2H), 7.41 (d,  $J$  = 8.0 Hz, 2H), 7.24 (dd,  $J$  = 7.8, 2.0 Hz, 1H), 7.10 (dd,  $J$  = 7.8, 7.8 Hz, 1H), 6.93 (dd,  $J$  = 7.8, 2.0 Hz, 1H), 4.31 (s, 2H), 4.12 (q,  $J$  = 7.1 Hz, 2H), 3.24 (t,  $J$  = 7.1 Hz, 2H), 2.85 (t,  $J$  = 7.1 Hz, 2H), 1.22 (t,  $J$  = 7.1 Hz, 3H);  $^{13}\text{C}$  NMR (ppm)  $\delta$  172.6, 150.6, 140.9 (d,  $J_{\text{C-F}}$  = 1.2 Hz), 129.8, 129.2 (q,  $J_{\text{C-F}}$  = 32.6 Hz), 125.6 (q,  $J_{\text{C-F}}$  = 3.8 Hz), 124.5, 124.4, 124.1 (q,  $J_{\text{C-F}}$  = 272.0 Hz), 123.9, 60.5, 36.9, 30.2, 27.0, 14.2 (A pair of peaks at the aromatic region was overlapped); IR ( $\text{cm}^{-1}$ ) 2982, 1732, 1326, 1162, 1122, 1110, 861, 766; HRMS(ESI) calcd for  $\text{C}_{18}\text{H}_{18}\text{F}_3\text{NNaO}_3$  ( $\text{M}^+\text{+Na}$ ): 376.1131; found: 376.1133.

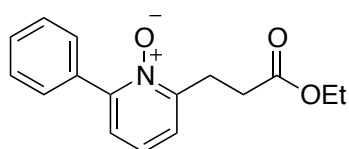

**2-(3-Ethoxy-3-oxopropyl)-6-phenylpyridine *N*-oxide (3d).**

Isolated by thin-layer chromatography (dichloromethane/acetone = 10/1,  $R_f$  = 0.65). The title compound was obtained as white yellow oil (79 %).  $^1\text{H}$  NMR (ppm)  $\delta$  7.79-7.77 (m, 2H), 7.48-7.41 (m, 3H), 7.34-7.30 (m, 2H), 7.22 (t,  $J$  = 7.7 Hz, 1H), 4.12 (q,  $J$  = 7.1 Hz, 2H), 3.26 (t,  $J$  = 7.1 Hz, 2H), 2.89 (t,  $J$  = 7.1 Hz, 2H), 1.23 (t,  $J$  = 7.1 Hz, 3H);  $^{13}\text{C}$  NMR (ppm)  $\delta$  172.8, 151.1, 149.4, 133.1, 129.4, 129.3, 128.1, 125.4, 125.2, 124.7, 60.5, 30.1, 27.4, 14.2; IR ( $\text{cm}^{-1}$ ) 2980, 1732, 1389, 1241, 1185, 841, 764, 697; HRMS(ESI) calcd for  $\text{C}_{16}\text{H}_{17}\text{NNaO}_3$  ( $\text{M}^+\text{+Na}$ ): 294.1101; found: 294.1100.

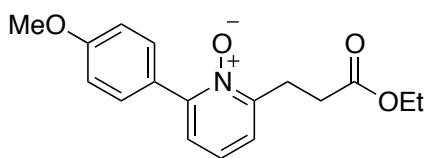

**2-(3-Ethoxy-3-oxopropyl)-6-(4-methoxyphenyl)pyridine *N*-oxide (3e).**

Isolated by thin-layer chromatography (dichloromethane/acetone = 10/1,  $R_f$  = 0.65). The title compound was obtained as white yellow oil (82 %).  $^1\text{H}$  NMR (ppm)  $\delta$  7.80 (d,  $J$  = 9.0 Hz, 2H), 7.32 (dd,  $J$  = 7.8, 2.2 Hz, 1H), 7.26 (dd,  $J$  = 7.8, 2.2 Hz, 1H), 7.19 (dd,  $J$  = 7.8, 7.8 Hz, 1H), 6.98 (d,  $J$  = 9.0 Hz, 2H), 4.12 (q,  $J$  = 7.2 Hz, 2H), 3.85 (s, 3H), 3.26 (t,  $J$  = 7.1 Hz, 2H), 2.89 (t,  $J$  = 7.1 Hz, 2H), 1.22 (t,  $J$  = 7.2 Hz, 3H);  $^{13}\text{C}$  NMR (ppm)  $\delta$  172.8, 160.3, 151.0, 149.0, 130.9, 125.3, 124.9, 124.7, 124.6, 113.5, 60.4, 55.3, 30.2, 27.4, 14.1; IR ( $\text{cm}^{-1}$ ) 2979, 1731, 1481, 1254, 1182, 1031, 834, 786; HRMS(ESI) calcd for  $\text{C}_{17}\text{H}_{19}\text{NNaO}_4$  ( $\text{M}^+\text{+Na}$ ): 324.1206; found: 324.1206.

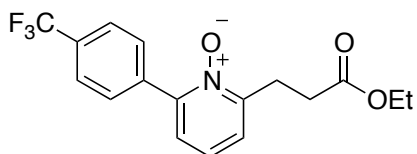

**2-(3-Ethoxy-3-oxopropyl)-6-(4-trifluoromethylphenyl)pyridine *N*-oxide (3f).**

Isolated by thin-layer chromatography (dichloromethane/acetone = 10/1,  $R_f$  = 0.70). The title compound was obtained as white yellow solid (73 %). Mp. 56 °C;  $^1\text{H}$  NMR (ppm)  $\delta$  7.92 (d,  $J$  = 8.1 Hz, 2H), 7.72 (d,  $J$  = 8.1 Hz, 2H), 7.38-7.34 (m, 2H), 7.28-7.26 (m, 1H), 4.12 (q,  $J$  = 7.2 Hz, 2H), 3.27 (t,  $J$  = 7.0 Hz, 2H), 2.89 (t,  $J$  = 7.0 Hz, 2H), 1.23 (t,  $J$  = 7.2 Hz, 3H);  $^{13}\text{C}$  NMR (ppm)  $\delta$  172.7, 151.4, 148.0, 136.6 (d,  $J_{\text{C-F}}$  = 1.3 Hz), 131.1 (q,  $J_{\text{C-F}}$  = 32.7 Hz), 129.9, 126.0, 125.4, 125.1 (q,  $J_{\text{C-F}}$  = 3.9 Hz), 124.8, 123.9 (q,  $J_{\text{C-F}}$  = 272.2 Hz), 60.5, 30.0, 27.3, 14.2; IR ( $\text{cm}^{-1}$ ) 2983, 1733, 1326, 1167, 1125, 1064, 839, 782; HRMS(ESI) calcd for  $\text{C}_{17}\text{H}_{16}\text{F}_3\text{NNaO}_3$  ( $\text{M}^+\text{+Na}$ ): 362.0974; found: 362.0975.

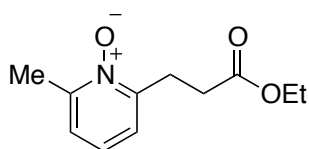

**2-(3-Ethoxy-3-oxopropyl)-6-methylpyridine *N*-oxide (3g).**

Isolated by thin-layer chromatography (dichloromethane/acetone = 1/1,  $R_f$  = 0.50). The title compound was obtained as white yellow oil (75 %).  $^1\text{H}$  NMR (ppm)  $\delta$  7.20-7.16 (m, 2H), 7.09 (d,  $J$  = 7.7, 7.7 Hz, 1H), 4.12 (q,  $J$  = 7.1 Hz, 2H), 3.23 (t,  $J$  = 7.1 Hz, 2H), 2.85 (t,  $J$  = 7.1 Hz, 2H), 2.53 (s, 3H), 1.22 (t,  $J$  = 7.1 Hz, 3H);  $^{13}\text{C}$  NMR (ppm)  $\delta$  172.7, 150.3, 149.1, 124.6, 124.4, 123.9, 60.4, 30.3, 27.0, 18.2, 14.1; IR ( $\text{cm}^{-1}$ ) 2981, 2931, 1732, 1243, 1163, 843, 774; HRMS(ESI) calcd for  $\text{C}_{11}\text{H}_{15}\text{NNaO}_3$  ( $\text{M}^+\text{+Na}$ ): 232.0944; found: 232.0944.

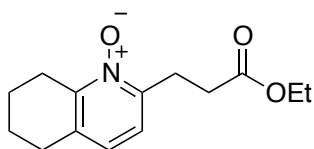

### 2-(3-Ethoxy-3-oxopropyl)-5,6,7,8-tetrahydroquinoline *N*-oxide (3h).

Isolated by thin-layer chromatography (dichloromethane/acetone = 10/1,  $R_f$  = 0.35). The title compound was obtained as light brown solid (78 %). Mp. 51 °C;  $^1\text{H}$  NMR (ppm)  $\delta$  7.08 (d,  $J$  = 8.0 Hz, 1H), 6.93 (d,  $J$  = 8.0 Hz, 1H), 4.11 (q,  $J$  = 7.1 Hz, 2H), 3.19 (t,  $J$  = 7.1 Hz, 2H), 2.94 (t,  $J$  = 6.4 Hz, 2H), 2.83 (t,  $J$  = 7.1 Hz, 2H), 2.74 (t,  $J$  = 6.4 Hz, 2H), 1.92-1.87 (m, 2H), 1.77-1.73 (m, 2H), 1.23 (t,  $J$  = 7.1 Hz, 3H);  $^{13}\text{C}$  NMR (ppm)  $\delta$  172.8, 148.6, 147.4, 134.0, 125.6, 122.3, 60.4, 30.4, 28.4, 26.8, 24.9, 22.0, 21.6, 14.1; IR ( $\text{cm}^{-1}$ ) 2936, 1732, 1499, 1434, 1390, 1184, 1163, 855, 806, 520; HRMS(ESI) calcd for  $\text{C}_{14}\text{H}_{19}\text{NNaO}_3$  ( $\text{M}^+\text{+Na}$ ): 272.1257; found: 272.1257.

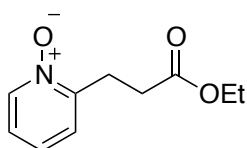

### 2-(3-Ethoxy-3-oxopropyl)pyridine *N*-oxide (3i).

Isolated by thin-layer chromatography (dichloromethane/acetone = 1/1,  $R_f$  = 0.30). The title compound was obtained as white yellow oil (13 %).  $^1\text{H}$  NMR (ppm)  $\delta$  8.24 (d,  $J$  = 6.1 Hz, 1H), 7.32 (dd,  $J$  = 7.5, 2.2 Hz, 1H), 7.22-7.15 (m, 2H), 4.12 (q,  $J$  = 7.1 Hz, 2H), 3.21 (t,  $J$  = 7.0 Hz, 2H), 2.86 (t,  $J$  = 7.0 Hz, 2H), 1.22 (t,  $J$  = 7.1 Hz, 3H);  $^{13}\text{C}$  NMR (ppm)  $\delta$  172.7, 150.7, 139.7, 126.7, 125.5, 124.1, 60.6, 30.2, 26.7, 14.3; IR ( $\text{cm}^{-1}$ ) 2927, 1731, 1439, 1246, 1186, 851, 768; HRMS(ESI) calcd for  $\text{C}_{10}\text{H}_{13}\text{NNaO}_3$  ( $\text{M}^+\text{+Na}$ ): 218.0788; found: 218.0789.

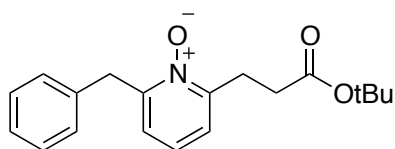

### 2-(3-*t*-Butoxy-3-oxopropyl)-6-(phenylmethyl)pyridine *N*-oxide (4a).

Isolated by thin-layer chromatography (dichloromethane/acetone = 10/1,  $R_f$  = 0.50). The title compound was obtained as colorless oil (56 %).  $^1\text{H}$  NMR (ppm)  $\delta$  7.35-7.32 (m, 2H), 7.28-7.25 (m, 3H), 7.16 (dd,  $J$  = 7.8, 1.9 Hz, 1H), 7.04 (t,  $J$  = 7.8 Hz, 1H), 6.81 (dd,  $J$  = 7.8, 1.9 Hz, 1H), 4.25 (s, 2H), 3.20 (t,  $J$  = 7.2 Hz, 2H), 2.75 (t,  $J$  = 7.2 Hz, 2H), 1.40 (s, 9H);  $^{13}\text{C}$  NMR (ppm)  $\delta$  172.1, 152.0, 150.7, 136.8, 129.8, 128.9, 127.0, 124.5, 123.9, 123.8, 80.7, 37.1, 31.7, 28.2, 27.2; IR ( $\text{cm}^{-1}$ ) 2978, 1727, 1367, 1250, 848, 765, 702; HRMS(ESI) calcd for  $\text{C}_{19}\text{H}_{23}\text{NNaO}_3$  ( $\text{M}^+\text{+Na}$ ): 336.1570; found: 336.1569.

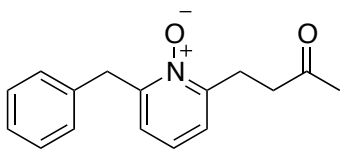

### 2-(3-Oxobutyl)-6-(phenylmethyl)pyridine *N*-oxide (5a)

Isolated by thin-layer chromatography (dichloromethane/acetone = 10/1,  $R_f$  = 0.30). The title compound was obtained as light brown oil (14%).  $^1\text{H}$  NMR (ppm)  $\delta$  7.37-7.34 (m, 2H), 7.30-7.27 (m, 3H), 7.22 (dd,  $J$  = 7.8, 1.8 Hz, 1H), 7.05 (dd,  $J$  = 7.8, 7.8 Hz, 1H), 6.81 (dd,  $J$  = 7.8, 1.8 Hz, 1H), 4.25 (s, 2H), 3.18 (t,  $J$  = 6.9 Hz, 2H), 3.02 (t,  $J$  = 6.9 Hz, 2H), 2.15 (s, 3H);  $^{13}\text{C}$  NMR (ppm)  $\delta$  151.9, 150.7, 136.6, 129.7, 128.8, 127.0, 124.7, 124.5, 123.7, 99.9, 39.4, 37.0, 29.8, 26.1; IR ( $\text{cm}^{-1}$ ) 2918, 1714, 1399, 1244, 850, 773, 700; HRMS(ESI) calcd for  $\text{C}_{16}\text{H}_{17}\text{NNaO}_2$  ( $\text{M}^+\text{+Na}$ ): 278.1152; found: 278.1150.

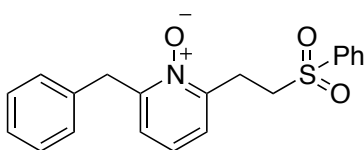

### 6-(Phenylmethyl)-2-[(2-phenylsulfonyl)ethyl]pyridine *N*-oxide (6a)

Isolated by thin-layer chromatography (dichloromethane/acetone = 20/1,  $R_f$  = 0.30). The title compound was obtained as light brown oil (14 %).  $^1\text{H}$  NMR (ppm)  $\delta$  7.90-7.88 (m, 2H), 7.64-7.60 (m, 1H), 7.54-7.51 (m, 2H), 7.37-7.33 (m, 2H), 7.30-7.27 (m, 1H), 7.22-7.21 (m, 3H), 7.05 (t,  $J$  = 7.9 Hz, 1H), 6.81 (dd,  $J$  = 7.9, 1.9 Hz, 1H), 4.14 (s, 2H), 3.74 (t,  $J$  = 7.4 Hz, 2H), 3.34 (t,  $J$  = 7.4 Hz, 2H);  $^{13}\text{C}$  NMR (ppm)  $\delta$  152.09, 147.4, 139.1, 136.2, 133.7, 129.6, 129.2, 128.9, 127.9, 127.1, 124.7, 124.7, 124.5, 51.4, 36.7, 26.3; IR ( $\text{cm}^{-1}$ ) 3060, 2925, 1307, 1245, 1149, 851, 732, 689, 525; HRMS(ESI) calcd for  $\text{C}_{20}\text{H}_{19}\text{NNaO}_3$  ( $\text{M}^+\text{+Na}$ ): 376.0978; found: 376.0978.

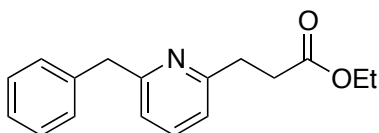

### 2-(3-Ethoxy-3-oxopropyl)-6-(phenylmethyl)pyridine (8).

Isolated by thin-layer chromatography (dichloromethane/methanol = 97.5/2.5,  $R_f$  = 0.40). The title compound was obtained as colorless oil (89 %).  $^1\text{H}$  NMR (ppm)  $\delta$  7.46 (t,  $J$  = 7.7 Hz, 1H), 7.31-7.24 (m, 4H), 7.22-7.19 (m, 1H), 6.99 (d,  $J$  = 7.7 Hz, 1H), 6.88 (d,  $J$  = 7.7 Hz, 1H), 4.12 (q,  $J$  = 7.1 Hz, 2H), 4.11 (s, 2H), 3.10 (t,  $J$  = 7.5 Hz, 2H), 2.79 (t,  $J$  = 7.5 Hz, 2H), 1.22 (t,  $J$  = 7.1 Hz, 3H);  $^{13}\text{C}$  NMR (ppm)  $\delta$  173.3, 160.5, 159.6, 139.8, 136.8, 129.2, 128.6, 126.3, 120.6, 120.3, 60.4, 44.8, 33.7, 33.0, 14.3; IR ( $\text{cm}^{-1}$ ) 2980, 1733, 1454, 1159, 739, 699; HRMS(ESI) calcd for  $\text{C}_{17}\text{H}_{19}\text{NNaO}_2$  ( $\text{M}^+\text{+Na}$ ): 292.1308; found: 292.1307.

## References

1. L.-C. Campeau, S. Rousseaux and K. Fagnou, *J. Am. Chem. Soc.*, 2005, **127**, 18020.
2. T. Suehiro, T. Niwa, H. Yorimitsu and K. Oshima, *Chem. Asian J.*, 2009, **4**, 1217.
3. H. P. Kokatla, P. F. Thomson, S. Bae, V. R. Doddi and M. K. Lakshman, *J. Org. Chem.*, 2011, **76**, 7842.
4. S. Kaiser, S. P. Smidt and A. Pfaltz, *Angew. Chem., Int. Ed.*, 2006, **45**, 5194.

7.3689  
7.3667  
7.3635  
7.3561  
7.3520  
7.3465  
7.3405  
7.3375  
7.3362  
7.3335  
7.2989  
7.2963  
7.2823  
7.2792  
7.2744  
7.2720  
7.2684  
7.2657  
7.2590  
7.2068  
7.2028  
7.1912  
7.1872  
7.0898  
7.0539  
7.0382  
6.8438  
6.8399  
6.8279  
6.8240

4.2802  
4.1432  
4.1288  
4.1144  
4.1000

3.2635  
3.2491  
3.2347  
2.8758  
2.8615  
2.8470

1.2422  
1.2277  
1.2132

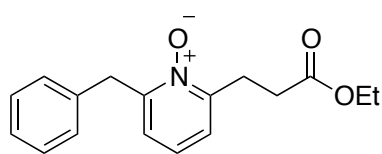

**3a**

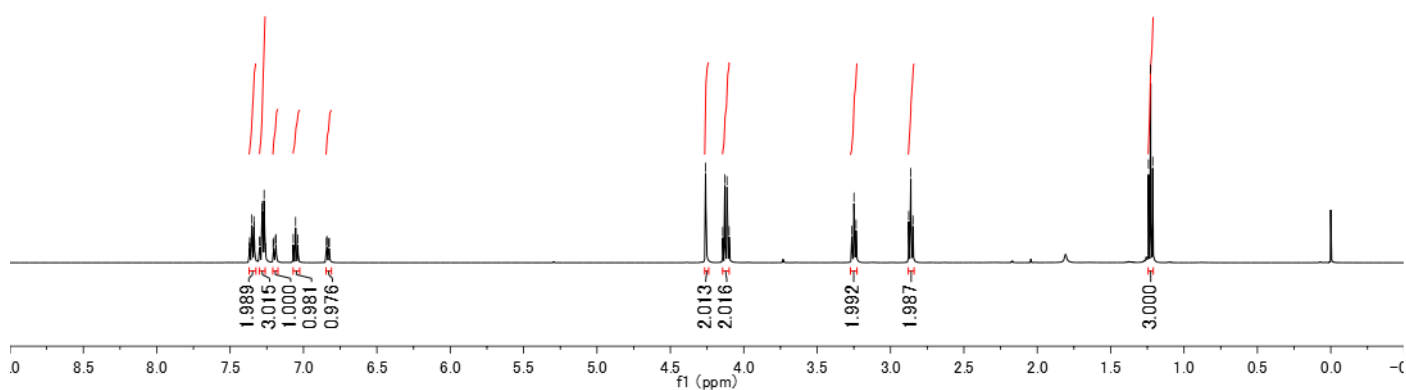

172.7053

151.9232  
150.2777

136.6305  
129.7013  
128.7644  
126.9088  
124.4772  
123.9017  
123.7460

77.2566  
77.0003  
76.7432

60.4934

36.9354

30.3244  
27.0403

14.1631

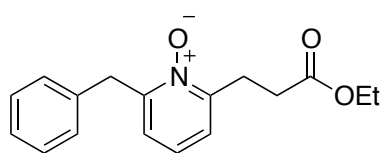

**3a**

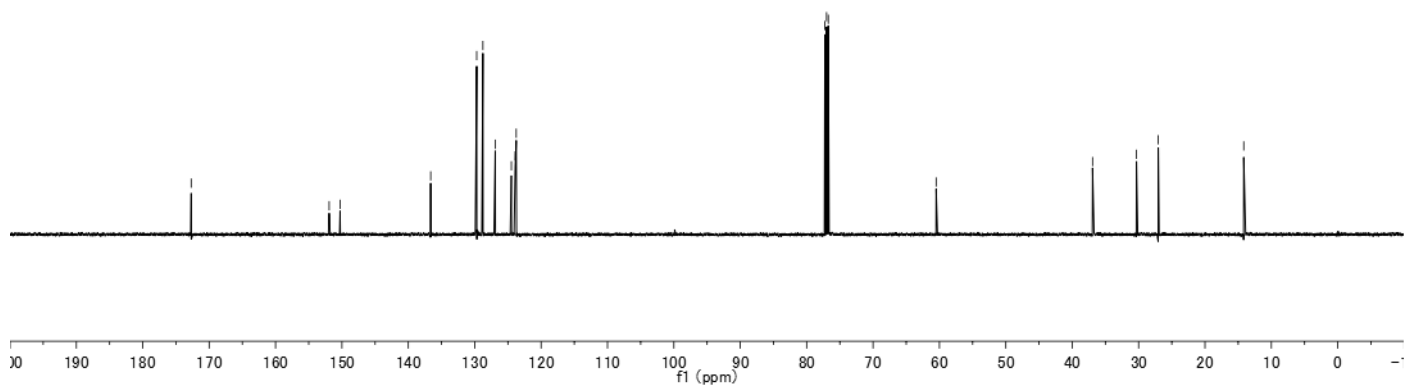



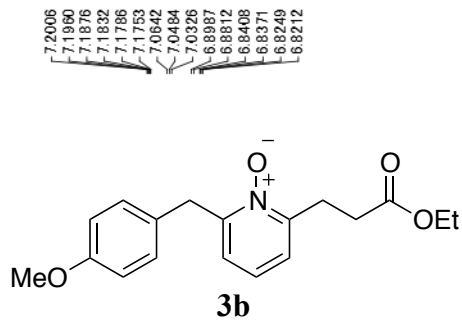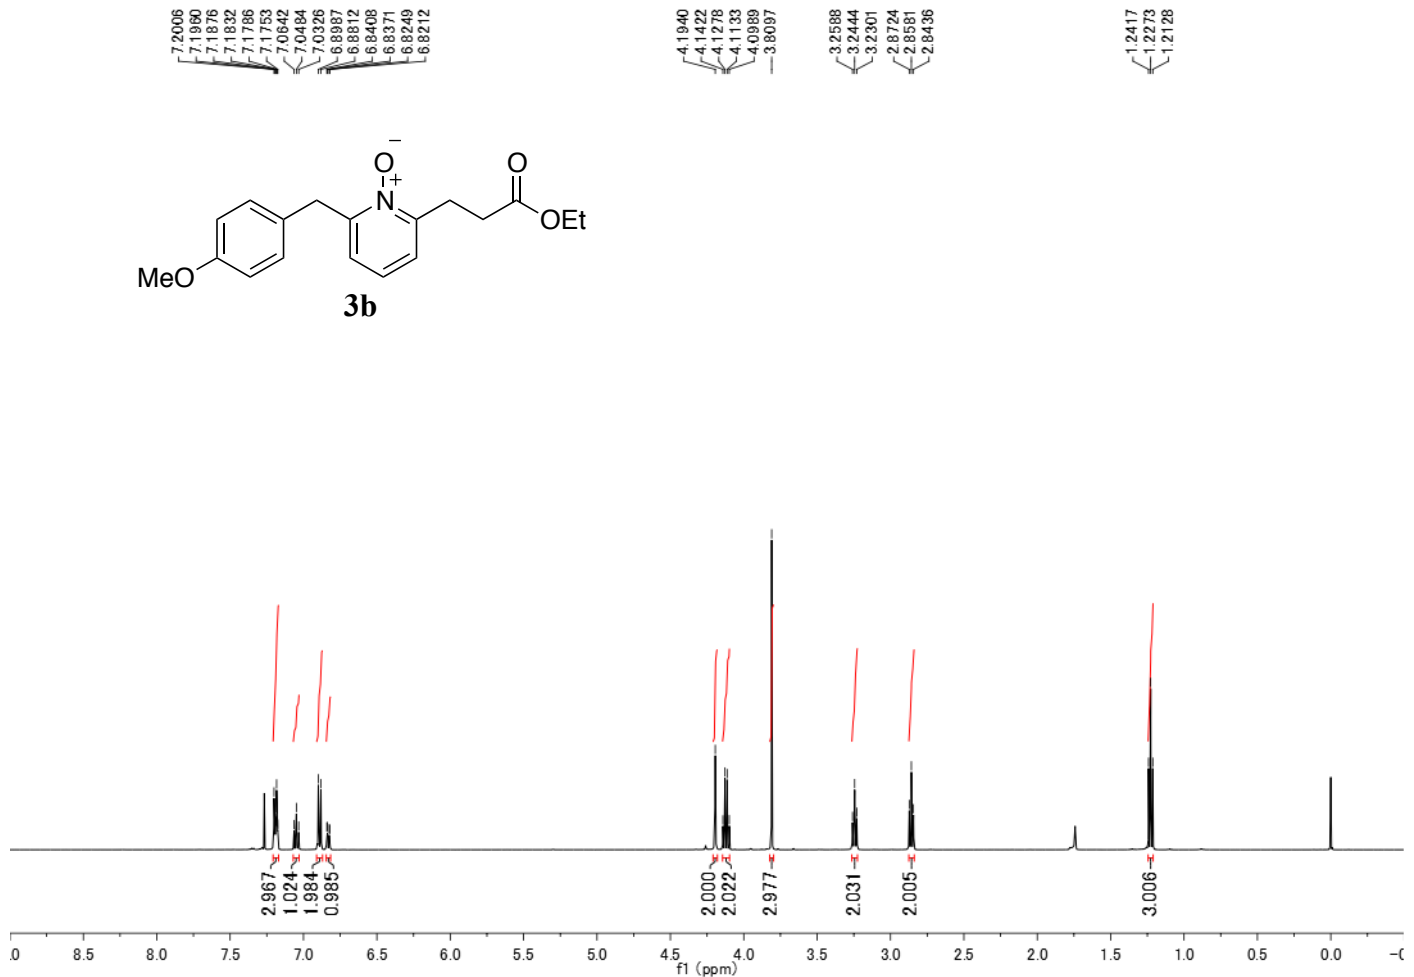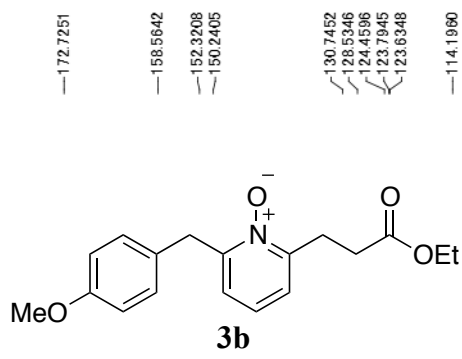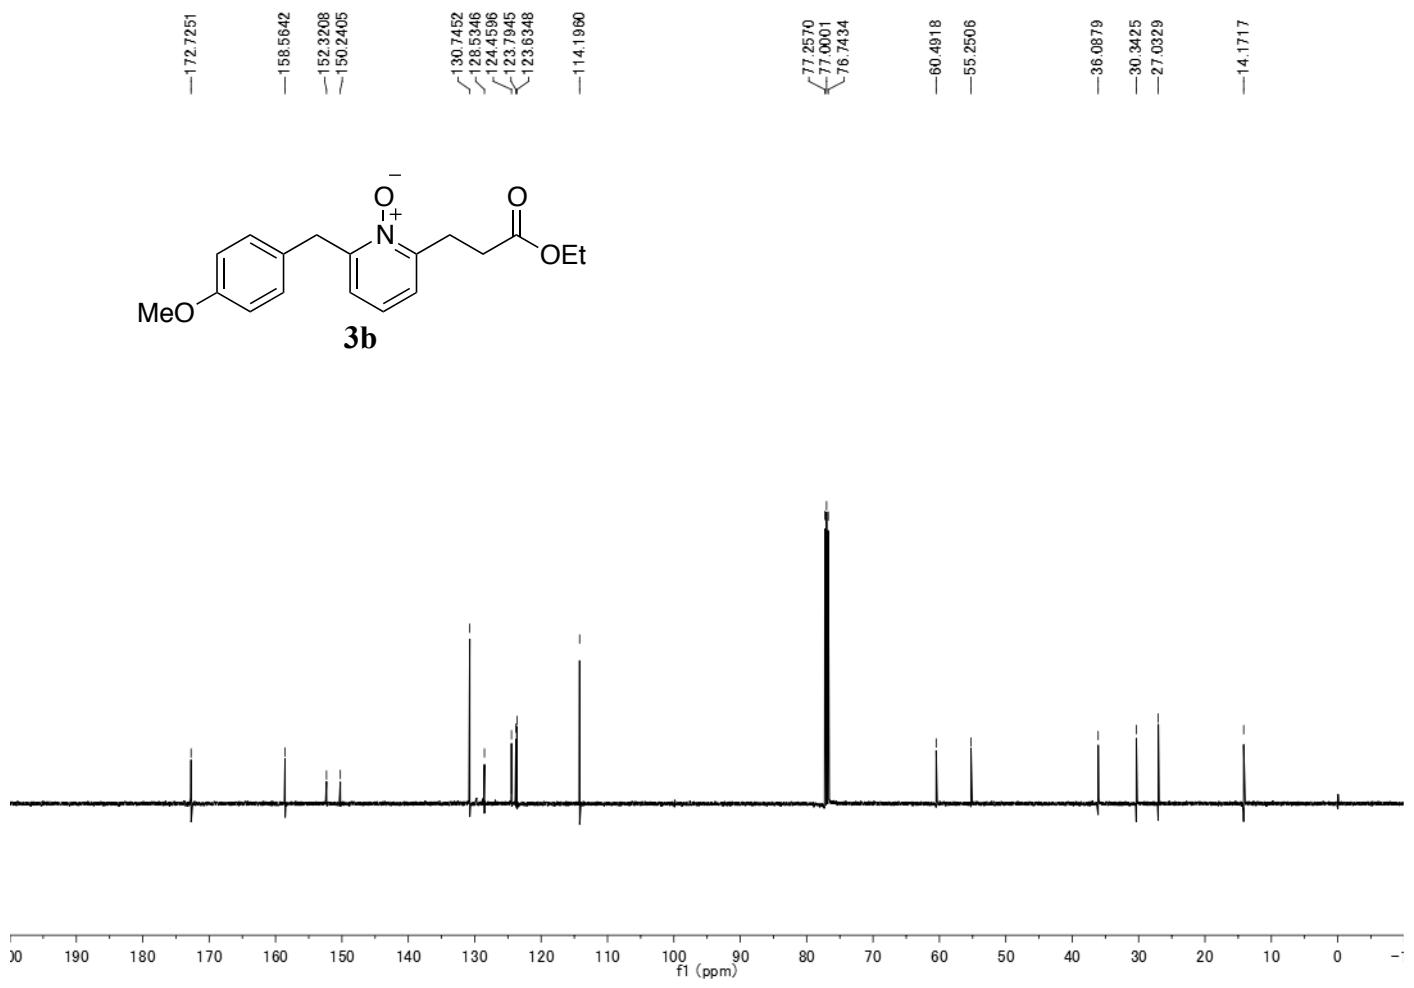

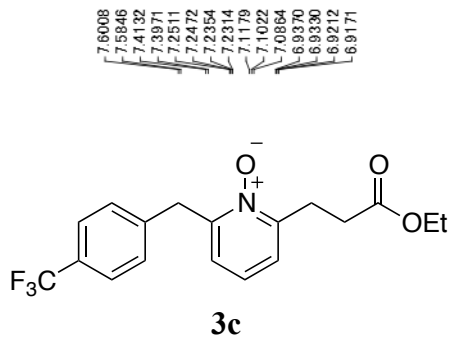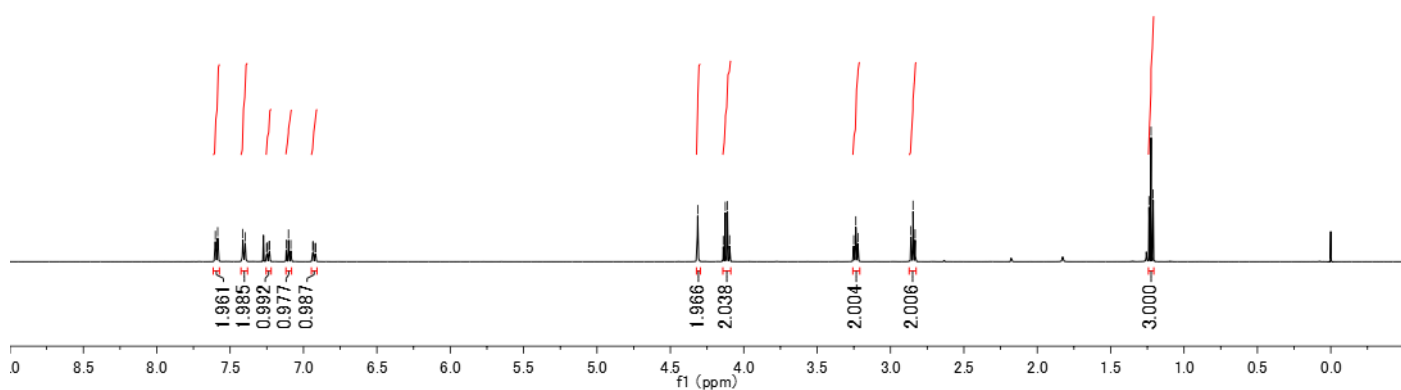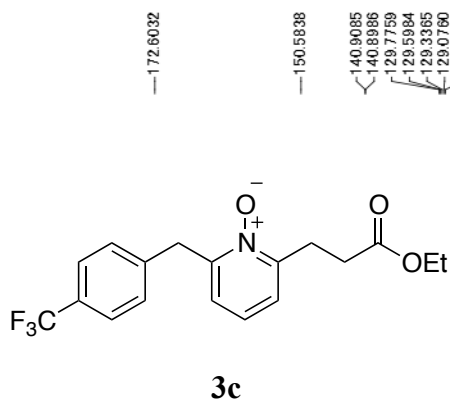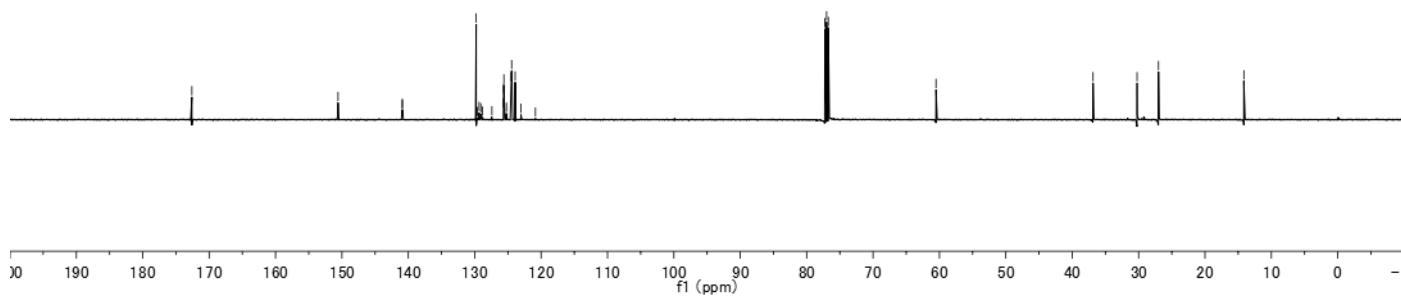

7.7918  
7.7885  
7.7843  
7.7784  
7.7751  
7.7723  
7.7673  
7.4835  
7.4801  
7.4793  
7.4671  
7.4658  
7.4629  
7.4616  
7.4538  
7.4511  
7.4497  
7.4452  
7.4418  
7.4403  
7.4387  
7.4333  
7.4278  
7.3438  
7.3394  
7.3282  
7.3239  
7.3191  
7.3148  
7.3033  
7.2989  
7.2395  
7.2238  
7.2082  
4.1300  
4.1155  
4.1011  
3.2784  
3.2641  
3.2499  
2.9068  
2.8926  
2.8783  
1.2408  
1.2264  
1.2120

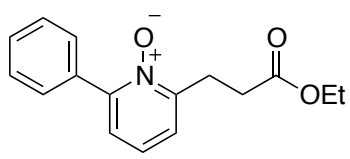

3d

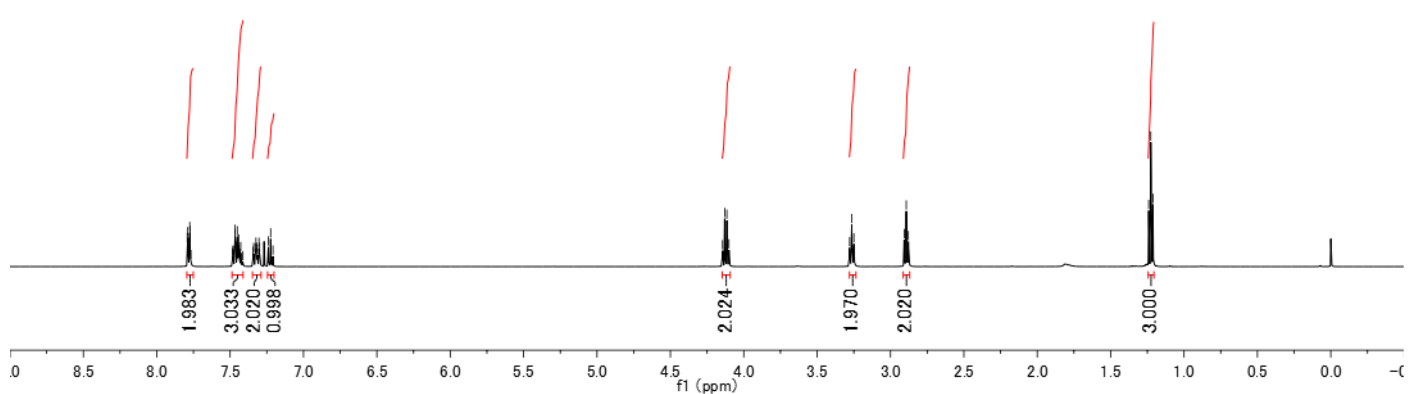

172.8173  
151.0992  
149.4164  
133.1330  
129.3797  
129.2975  
128.1000  
125.3948  
125.2250  
124.7377  
77.2567  
76.9999  
76.7434  
60.4530  
30.1412  
27.3568  
14.1527

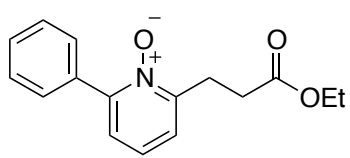

3d

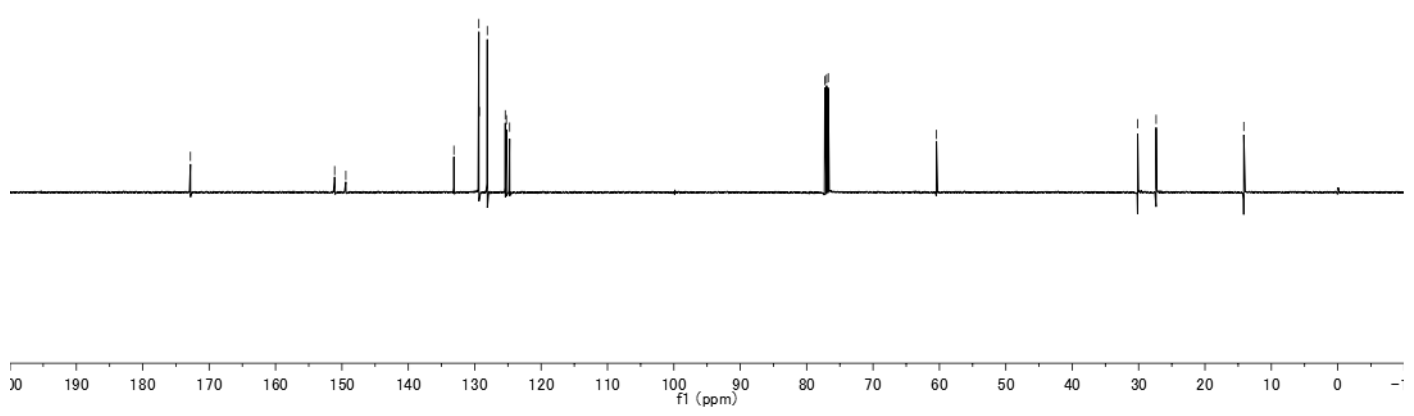

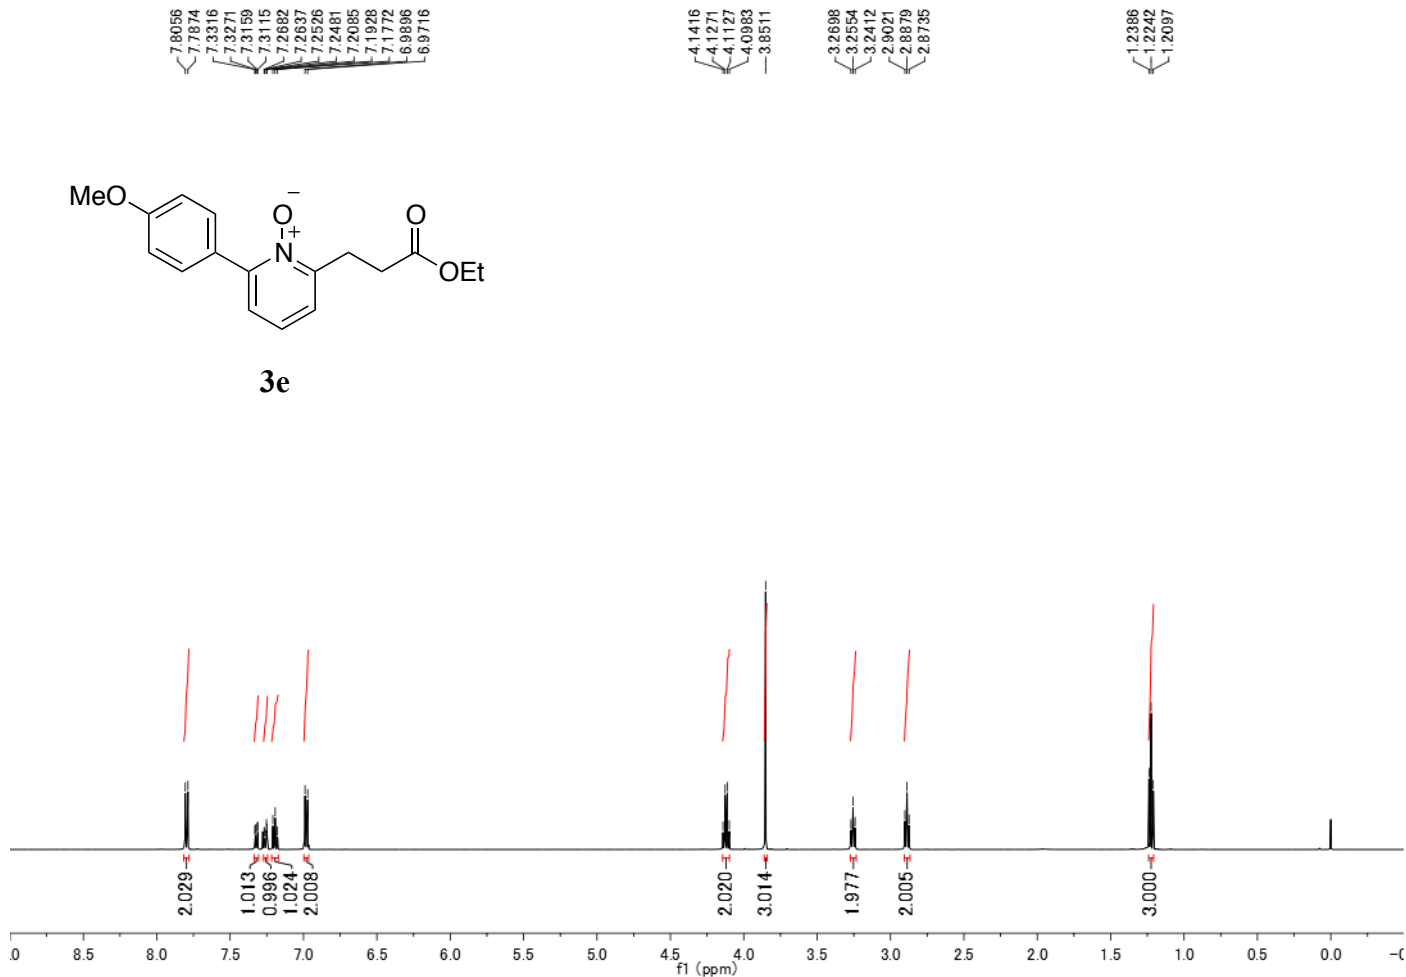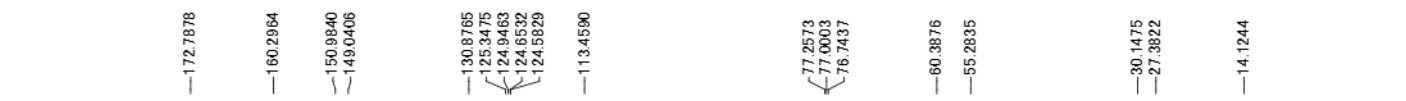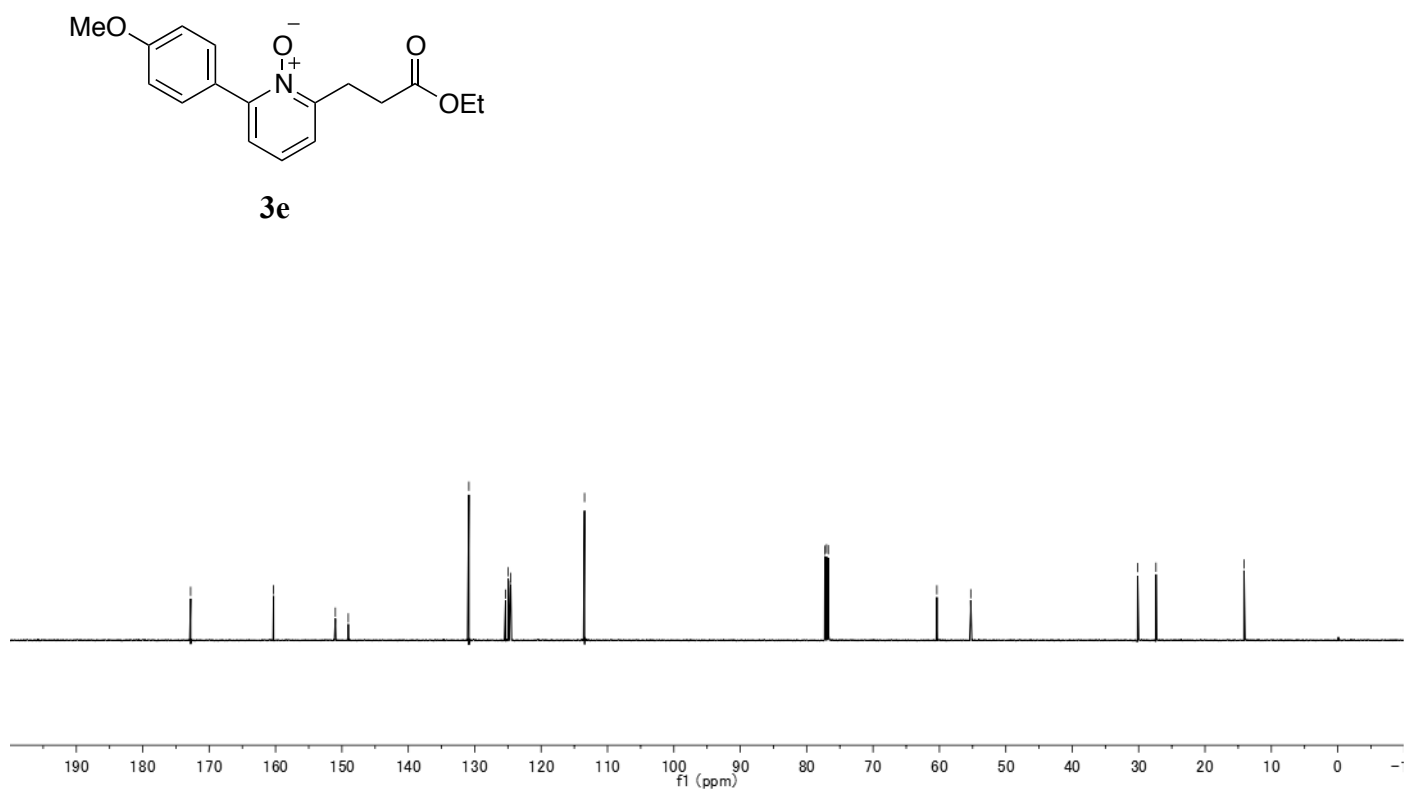

7.9280  
7.9118  
7.7324  
7.7159  
7.3826  
7.3783  
7.3672  
7.3629  
7.3584  
7.3539  
7.3424  
7.3379  
7.2787  
7.2717  
7.2630

4.1501  
4.1357  
4.1213  
4.1069

3.2800  
3.2858  
3.2517  
2.9020  
2.8879  
2.8736

1.2469  
1.2324  
1.2180

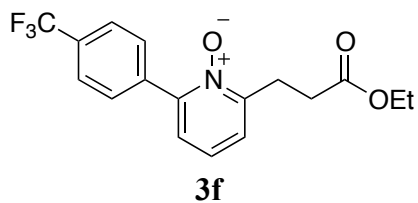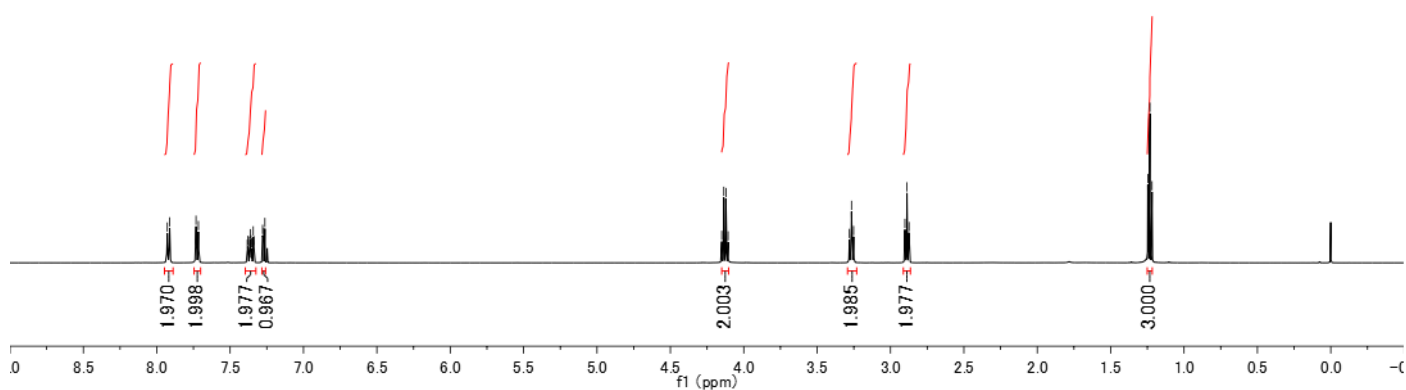

172.6795

151.3760  
147.9826  
136.6358  
136.6257  
131.5252  
131.2631  
131.0004  
130.7378  
129.8485  
126.0265  
125.3748  
125.1092  
125.0787  
125.0489  
125.0171  
124.9642  
124.8225  
122.7768

77.2564  
76.9999  
76.7431

60.5218

30.0232  
27.2608

14.1472

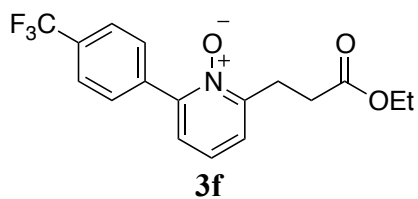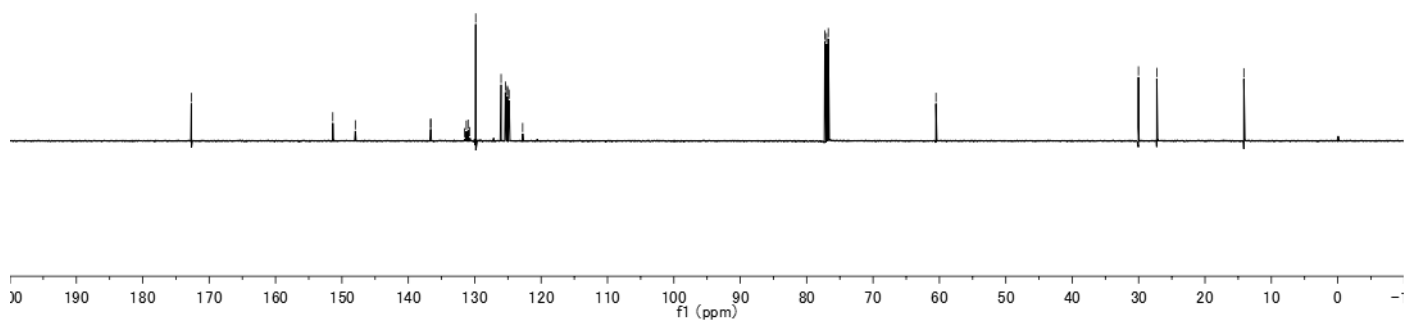

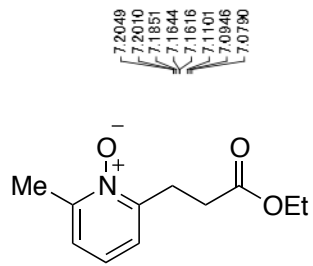

3g

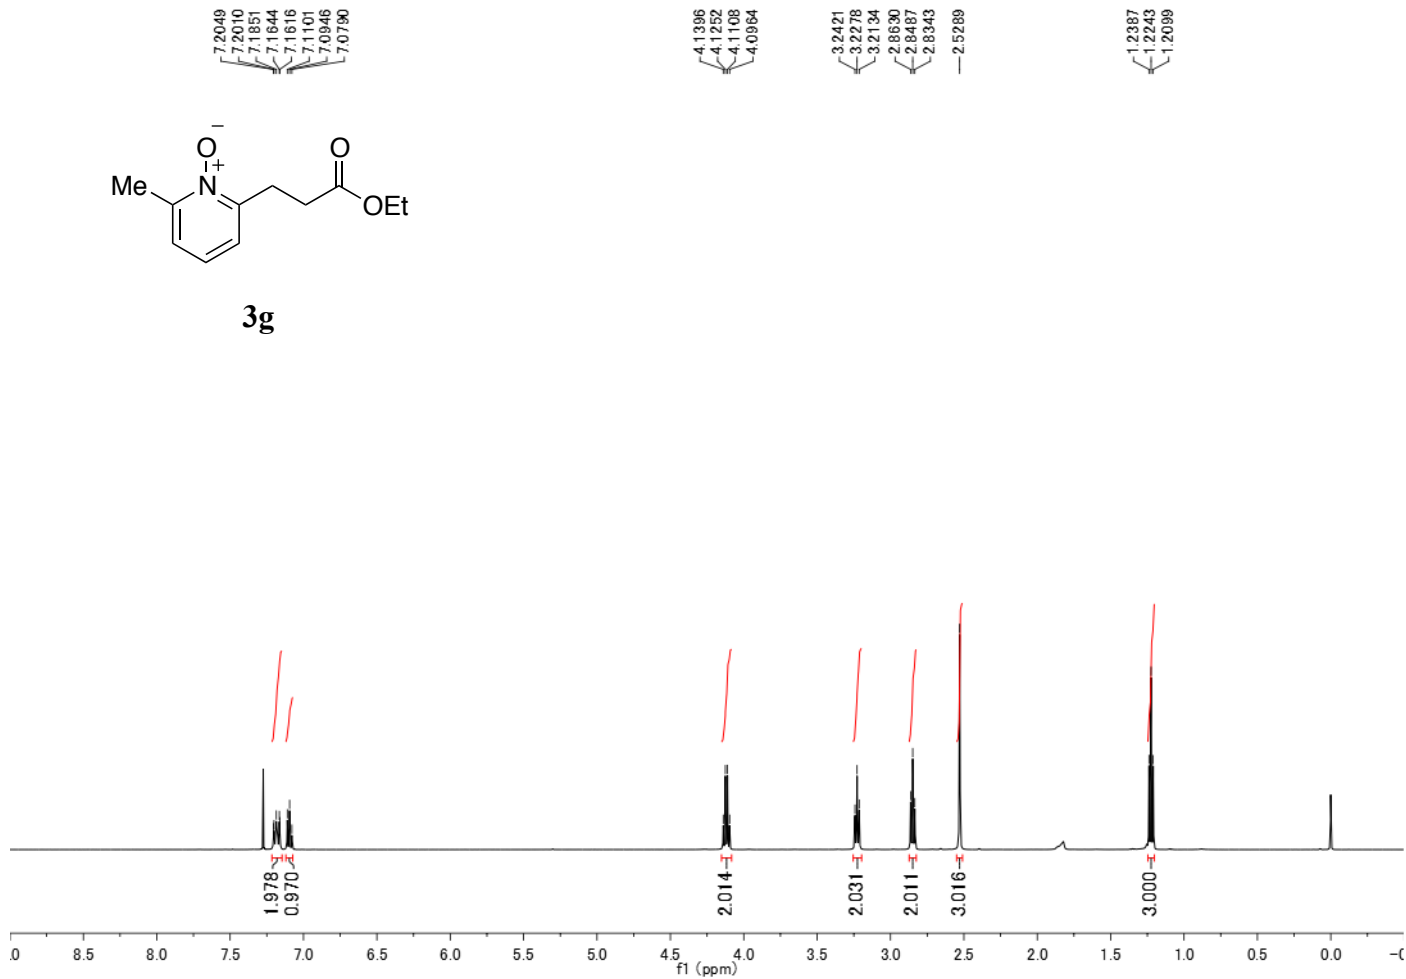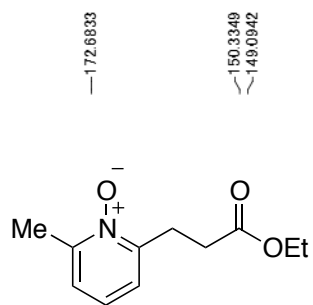

3g

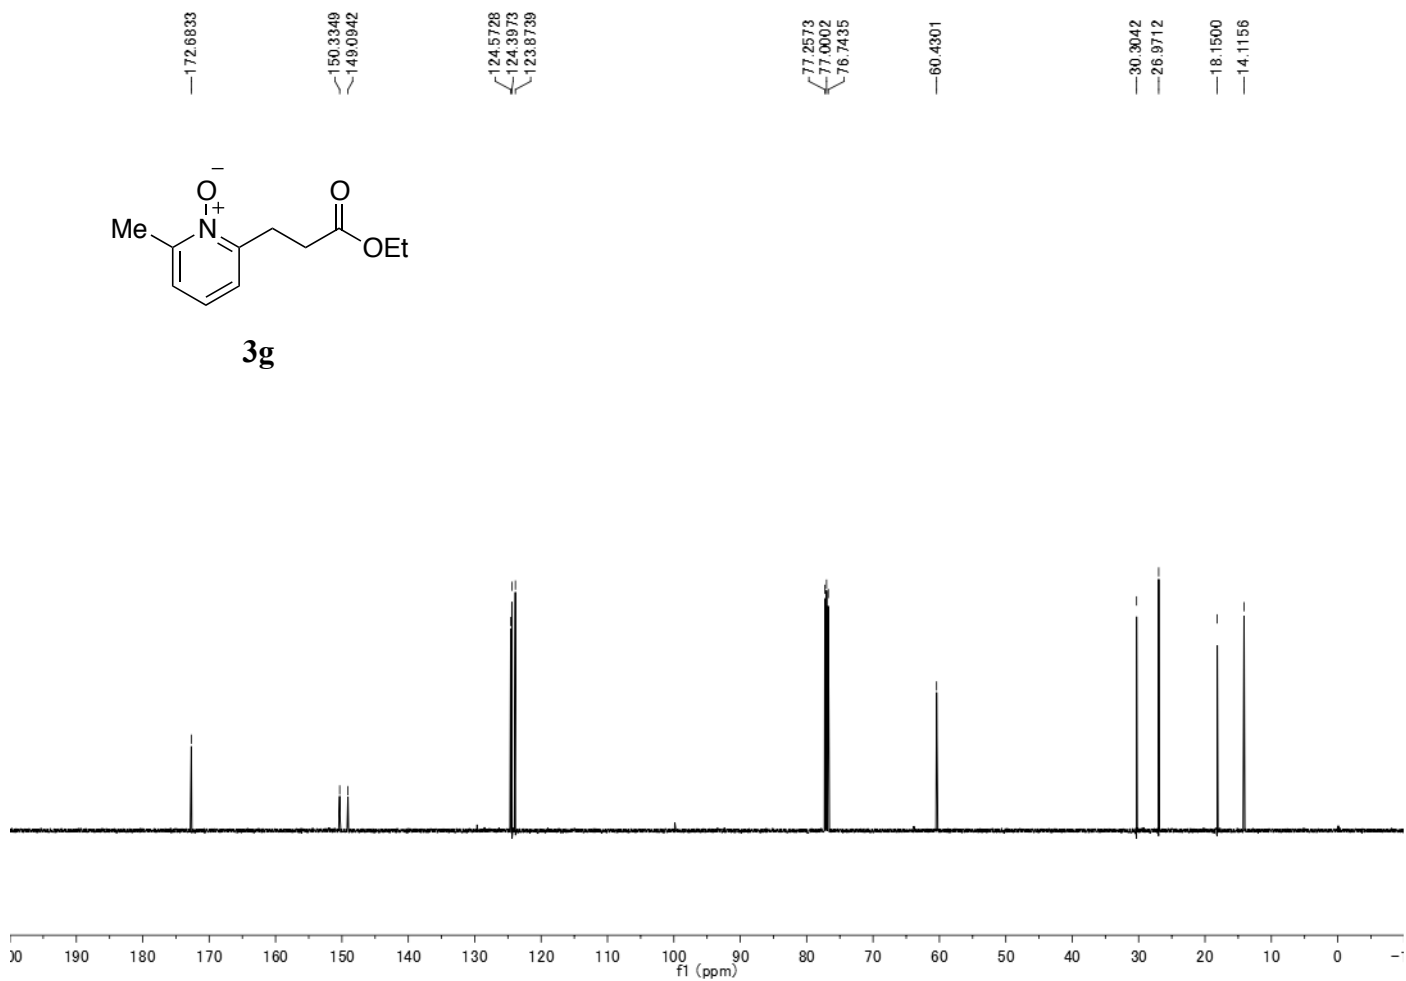

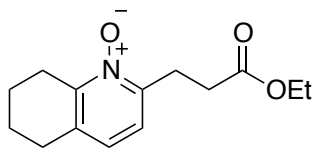

**3h**

7.0896  
7.0735  
6.9981  
6.9220

4.1365  
4.1221  
4.1077  
4.0932

3.2048  
3.1904  
3.1761  
2.9524  
2.9392  
2.9259  
2.8469  
2.8326  
2.8182  
2.7560  
2.7435  
2.7311

1.9049  
1.8838  
1.8812  
1.7624  
1.7574  
1.7501  
1.7388  
1.7260  
1.2116

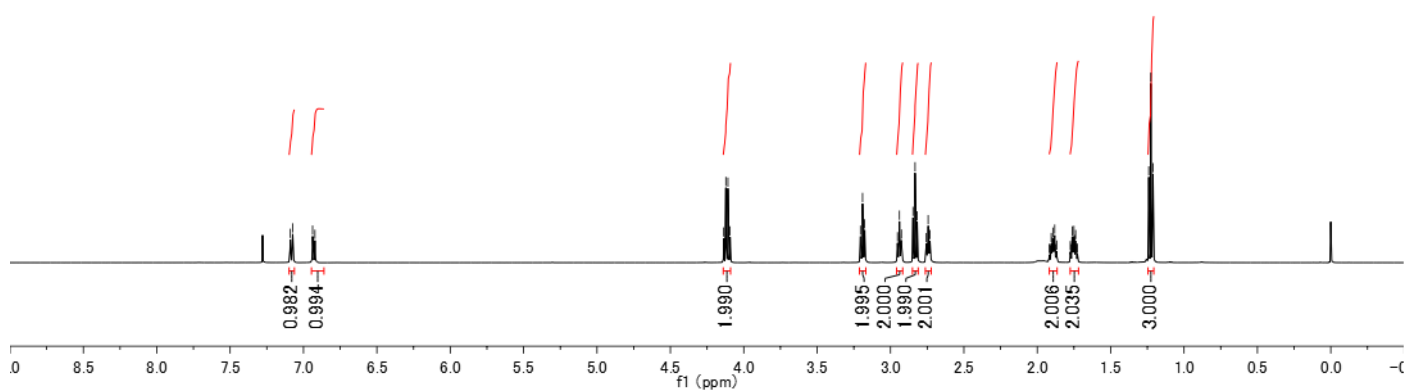

172.8028

148.6231  
147.4200

134.0017

125.5945  
122.3441

77.2569  
77.0003  
76.7433

60.3656

30.3998  
28.4275  
26.8091  
24.8986  
21.9530  
21.5982

14.1311

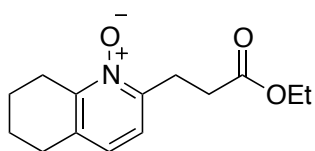

**3h**

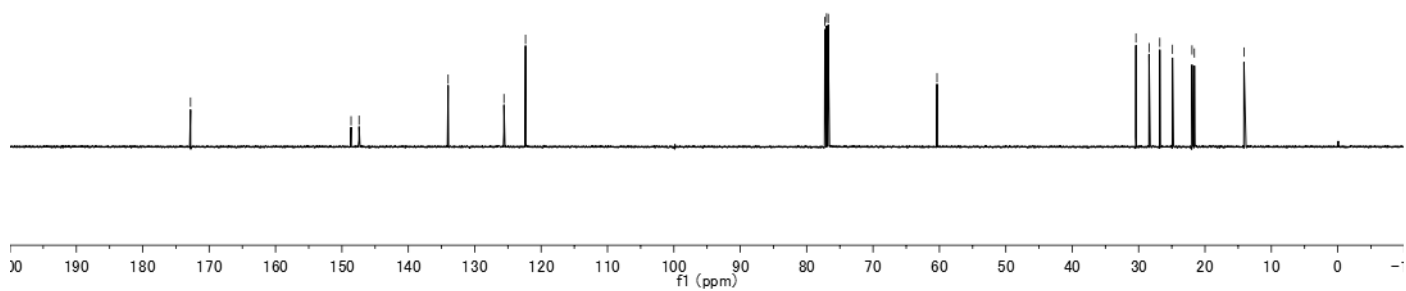

8.2487  
8.2364  
7.3342  
7.3297  
7.3189  
7.3145  
7.2172  
7.2147  
7.2020  
7.1894  
7.1869  
7.1835  
7.1780  
7.1699  
7.1661  
7.1548  
7.1503

4.1377  
4.1233  
4.1089  
4.0945

3.2257  
3.2114  
3.1972  
2.8708  
2.8566  
2.8423

1.2389  
1.2245  
1.2100

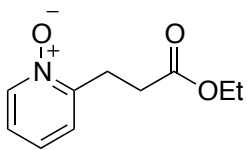

3i

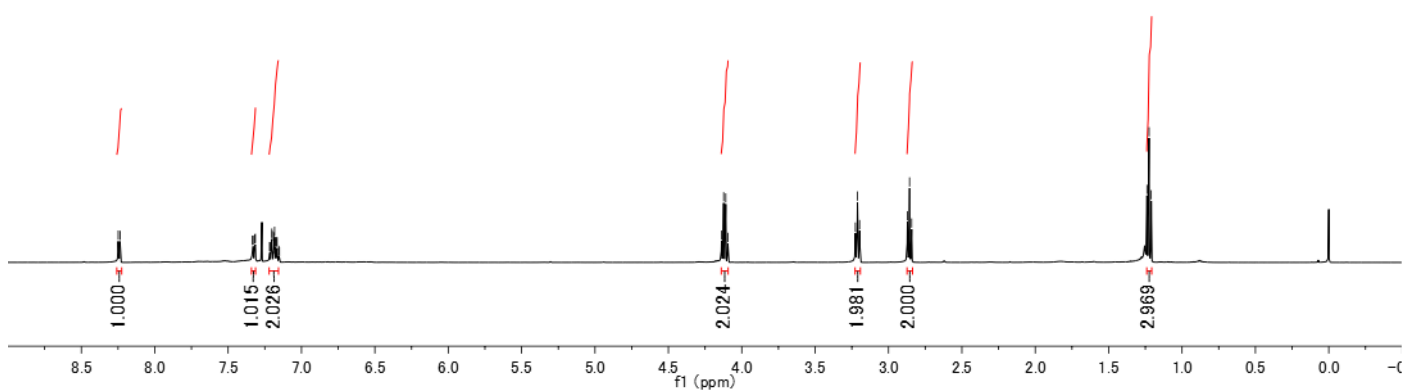

172.7078

150.6764

139.7469

126.7001

125.5394

124.0821

60.6464

30.1948

26.7357

14.2664

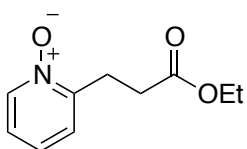

3i

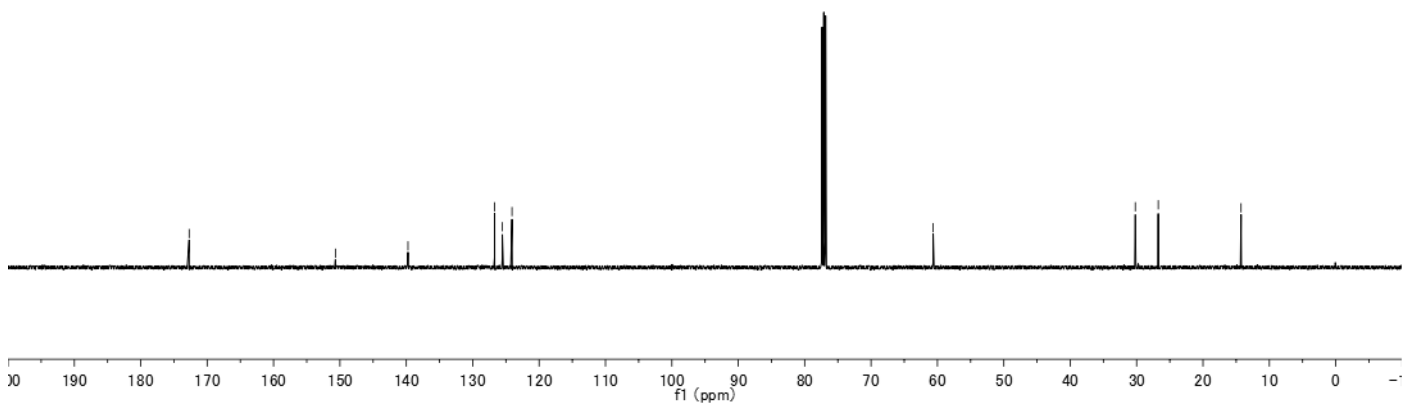



7.3535  
7.3516  
7.3486  
7.3408  
7.3365  
7.3254  
7.3223  
7.2834  
7.2810  
7.2678  
7.2644  
7.2600  
7.2525  
7.1742  
7.1703  
7.1585  
7.1546  
7.0520  
7.0362  
7.0205  
6.8239  
6.8201  
6.8080  
6.8042

—4.2499

3.2111  
3.1965  
3.1820  
2.7637  
2.7492  
2.7346

—1.4006

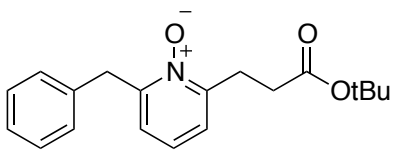

**4a**

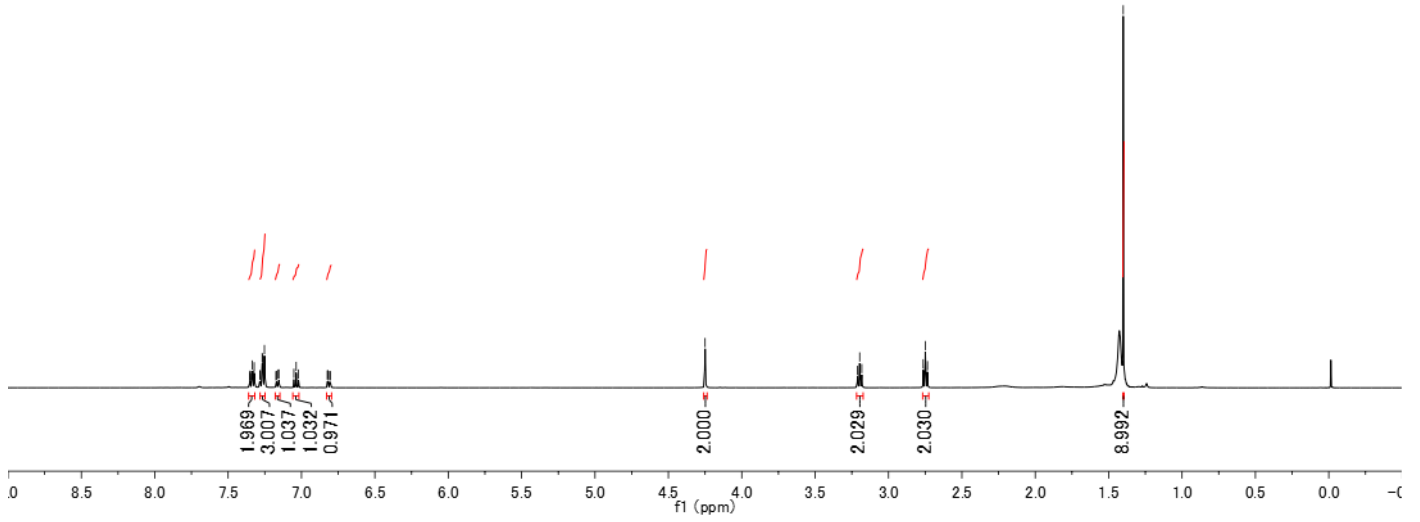

—172.0476

152.0208  
150.6951

—136.7958

129.8130  
128.8782  
127.0101  
124.5415  
123.8415  
123.7514

80.6580  
77.3642  
77.1071  
76.8507

—37.0701

31.6894  
28.1614  
27.2462

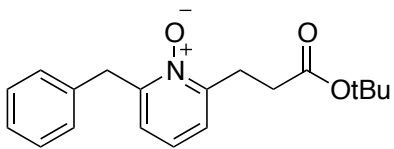

**4a**

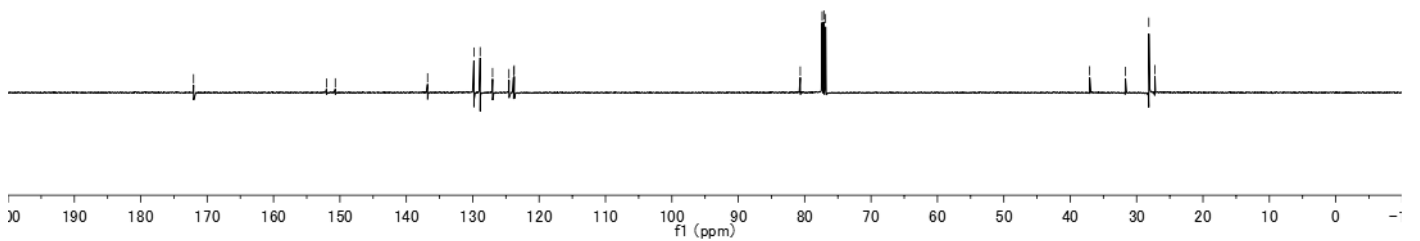

7.3696  
7.3669  
7.3588  
7.3554  
7.3401  
7.3029  
7.3003  
7.2880  
7.2834  
7.2743  
7.2329  
7.2293  
7.2174  
7.2136  
7.0629  
7.0472  
7.0314  
6.8244  
6.8208  
6.8085  
6.8049

—4.2494

3.1934  
3.1794  
3.1656  
3.0381  
3.0243  
3.0102

—2.1528

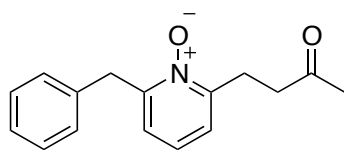

5a

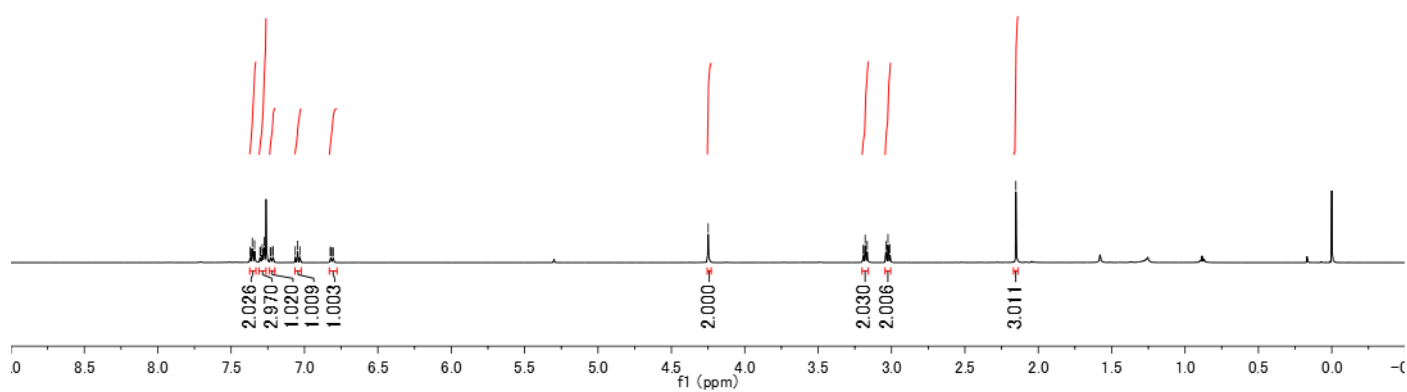

151.9042  
150.6993

136.6393  
129.7257  
128.8110  
126.9556  
124.6596  
124.4887  
123.7095

—99.9108

77.2566  
77.0004  
76.7435

39.4284  
36.9588  
29.8397  
26.1336

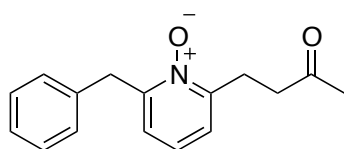

5a

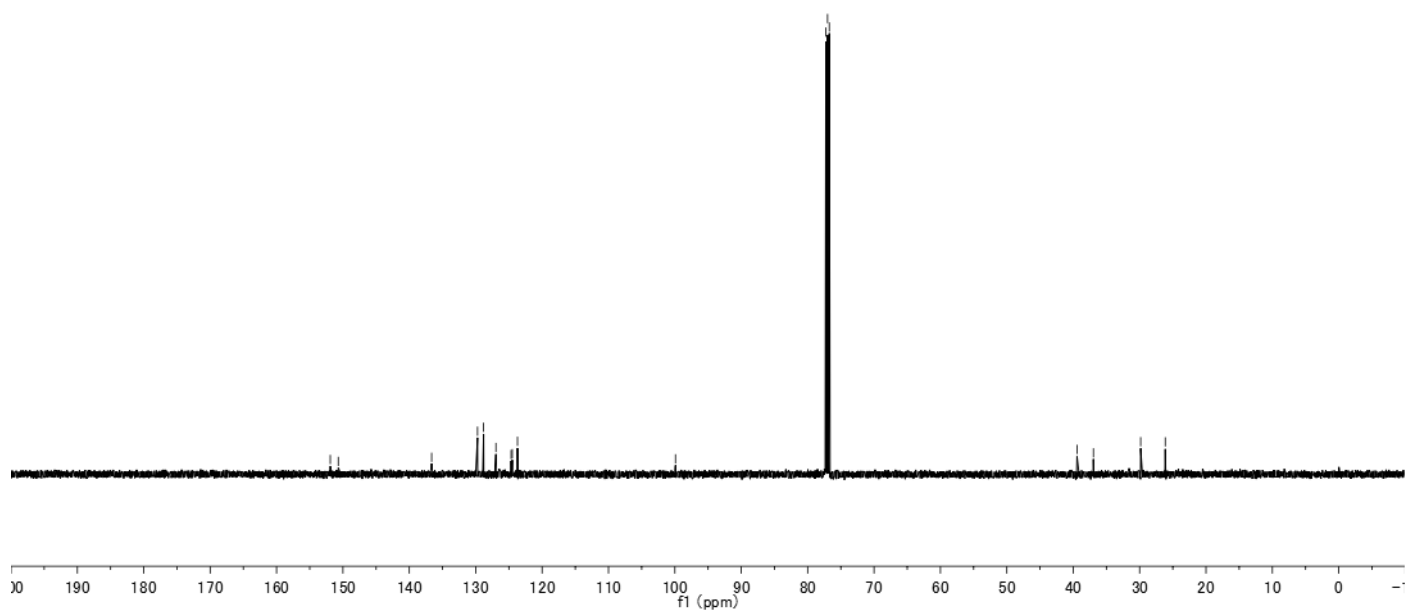

7.8994  
7.8974  
7.8868  
7.8829  
7.8801  
7.6346  
7.6196  
7.6070  
7.6045  
7.6020  
7.5383  
7.5351  
7.5220  
7.5070  
7.5060  
7.3631  
7.3524  
7.3489  
7.3462  
7.3364  
7.3336  
7.3022  
7.2996  
7.2873  
7.2234  
7.2207  
7.2068  
7.0627  
7.0468  
7.0311  
6.8166  
6.8128  
6.8007  
6.7988  
3.7584  
3.7441  
3.7291  
3.3553  
3.3400  
3.3261

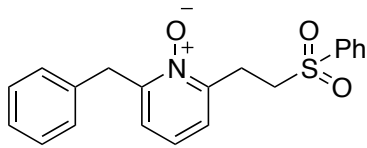

**6a**

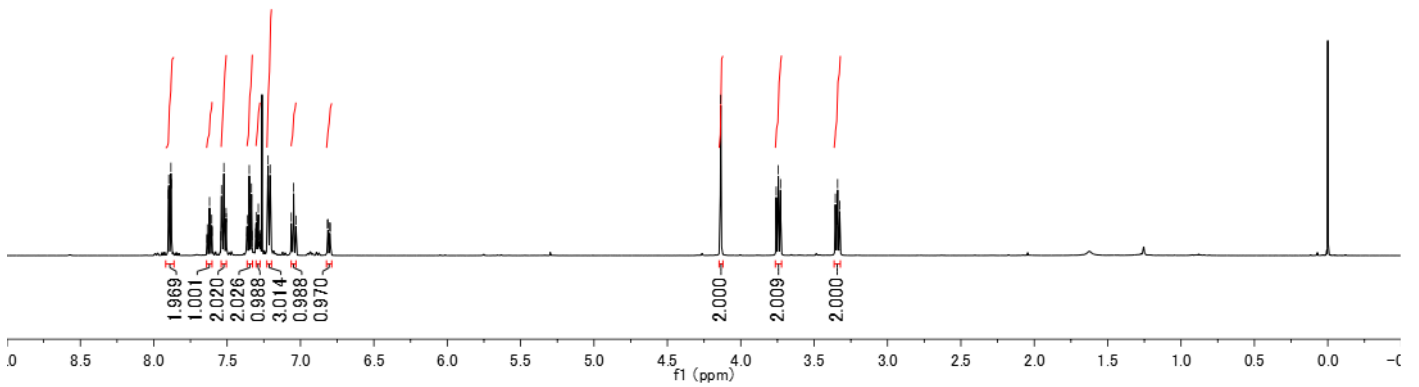

151.9936  
147.3847  
139.0504  
136.2300  
133.6622  
129.6305  
129.2017  
128.8610  
127.8945  
127.0658  
124.7144  
124.6789  
124.5013  
77.2562  
76.9998  
76.7430  
51.4326  
36.7390  
26.3068

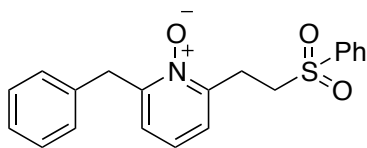

**6a**

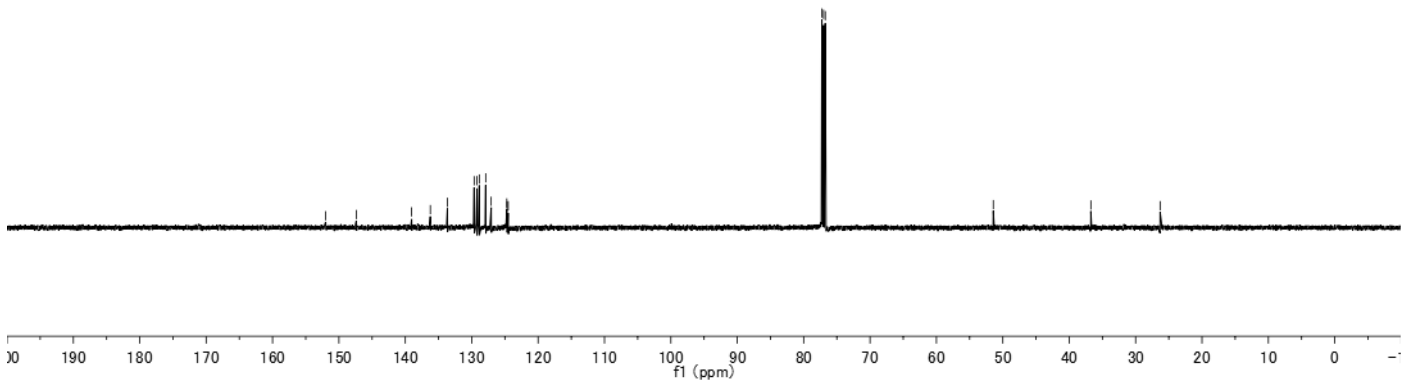

7.4722  
7.4567  
7.4412  
7.3062  
7.3045  
7.3014  
7.2927  
7.2912  
7.2895  
7.2794  
7.2753  
7.2743  
7.2638  
7.2626  
7.2604  
7.2505  
7.2494  
7.2481  
7.2471  
7.2440  
7.2226  
7.2193  
7.2158  
7.2121  
7.2093  
7.2051  
7.2003  
7.1945  
7.1910  
7.1878  
6.9987  
6.9833  
6.8906  
6.8752

4.1398  
4.1254  
4.1110  
4.0966

3.1195  
3.1043  
3.0891  
2.8096  
2.7942  
2.7792

1.2389  
1.2245  
1.2101

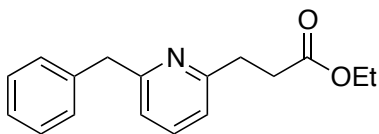

8

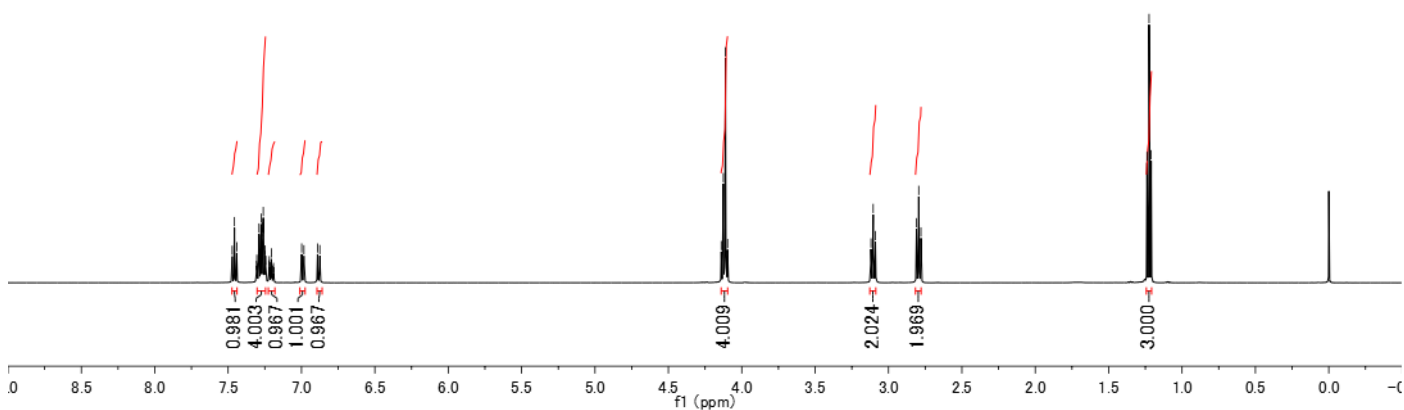

173.1624

160.4230  
159.4739

139.6572  
136.7240

129.1017  
128.4456  
126.2342  
120.5187  
120.2306

77.2570  
77.0002  
76.7439

60.3050

44.6823

33.5870  
32.9267

14.2059

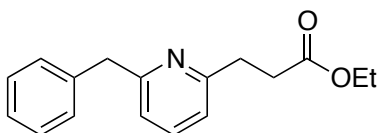

8

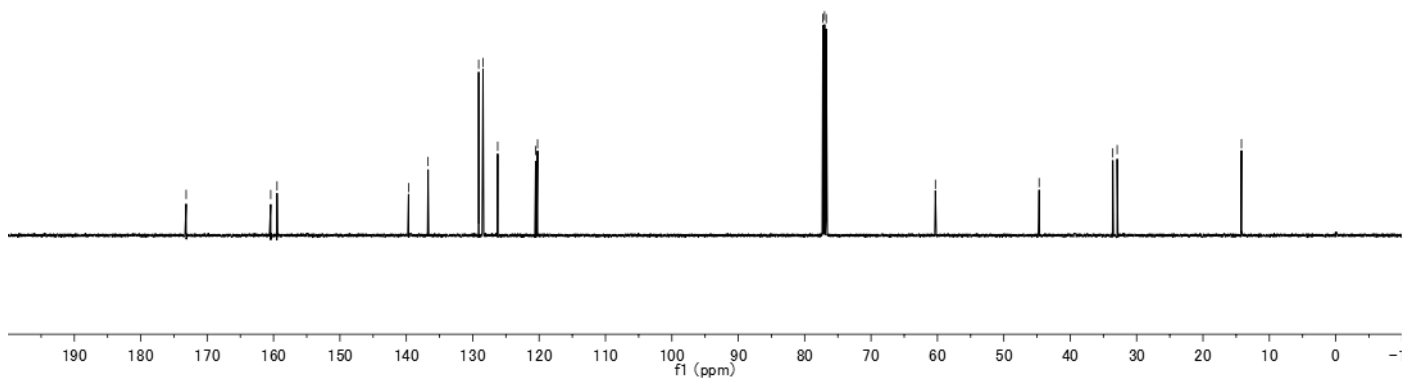

8.2946  
8.2896  
8.2793  
7.3687  
7.3565  
7.3533  
7.3431  
7.3392  
7.3015  
7.2895  
7.2876  
7.2845  
7.2804  
7.2714  
7.1428  
7.1368  
7.1293  
6.9569  
6.9560  
6.9508  
6.9437  
6.9374  
6.9308

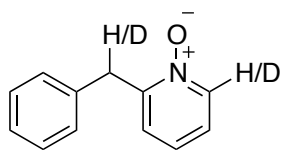

Recovered **1a** in Scheme 4

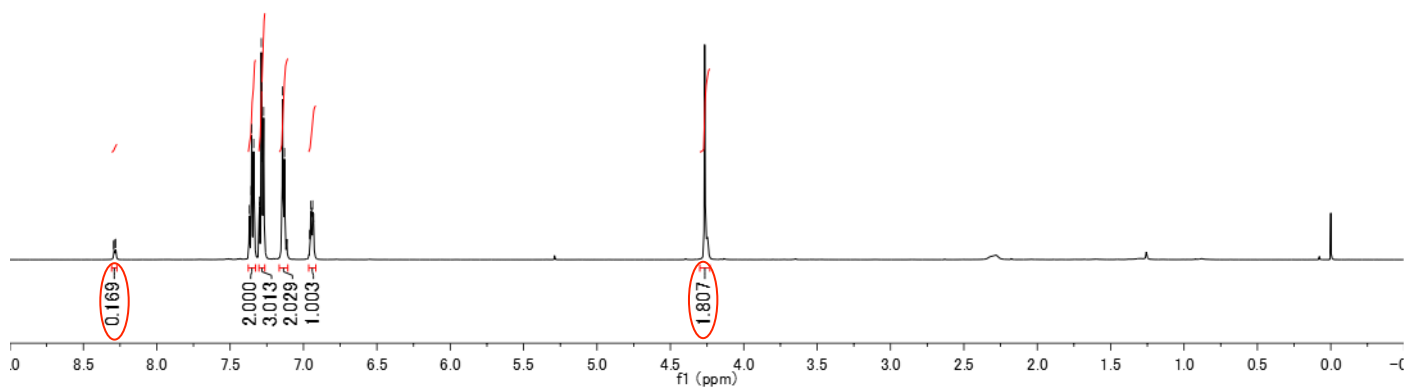

8.2403  
8.2334  
8.2277  
8.2236  
7.2991  
7.2952  
7.2921

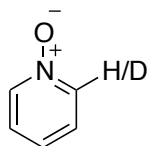

Recovered **1i** in Scheme4

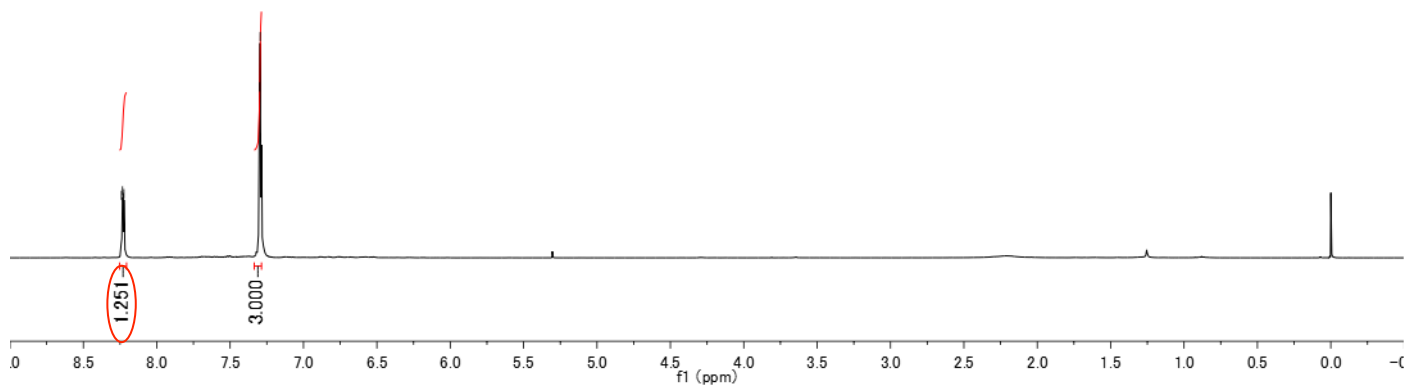

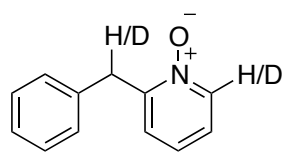

1a-D

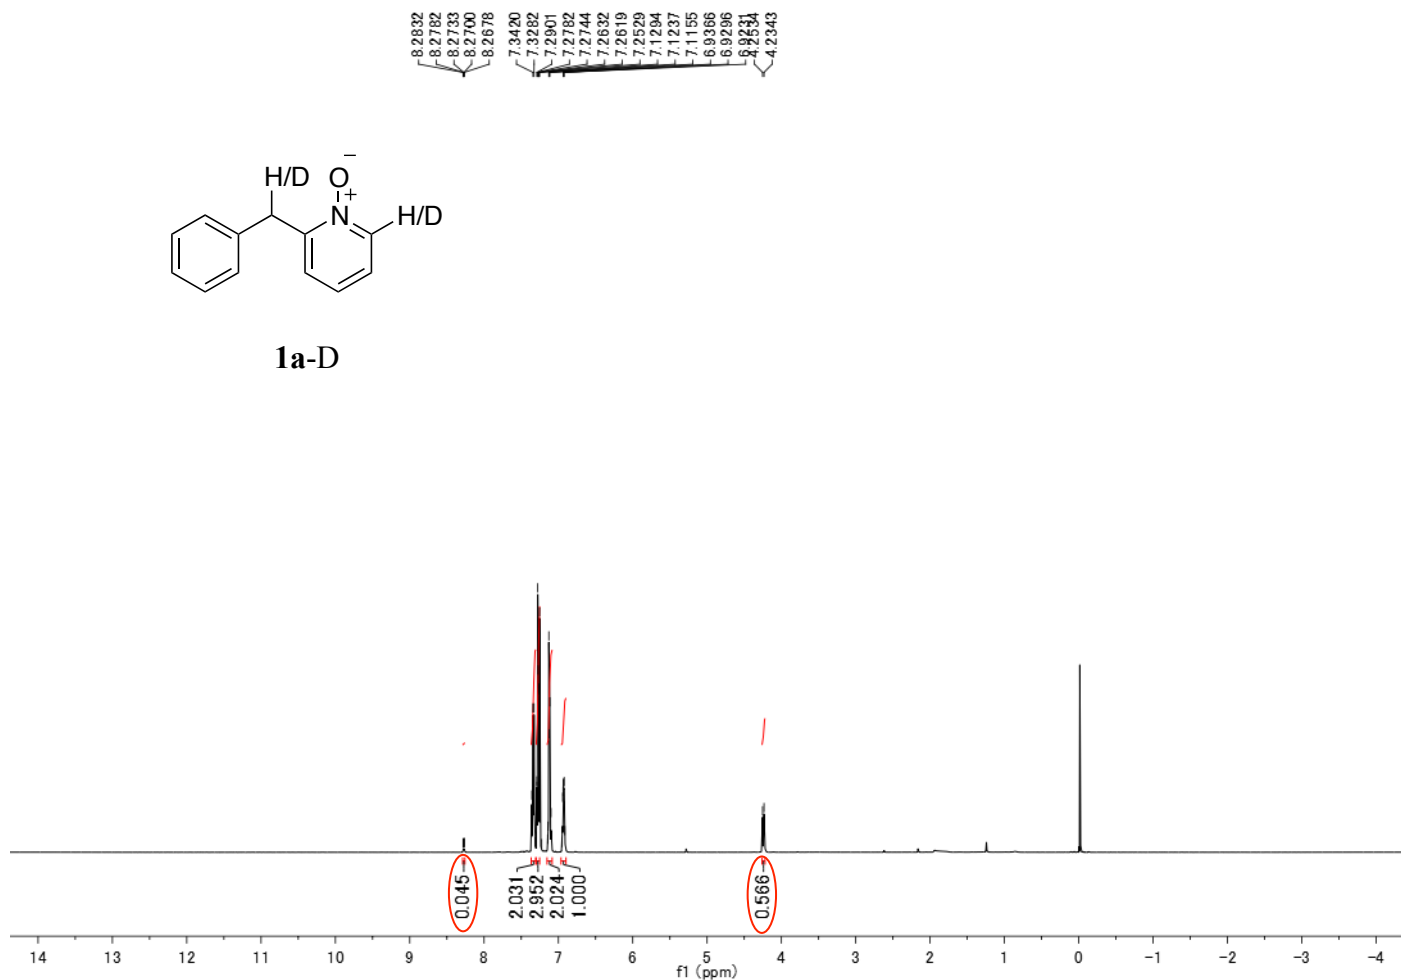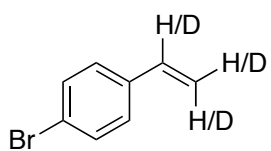

Recovered bromostyrene in Scheme 5

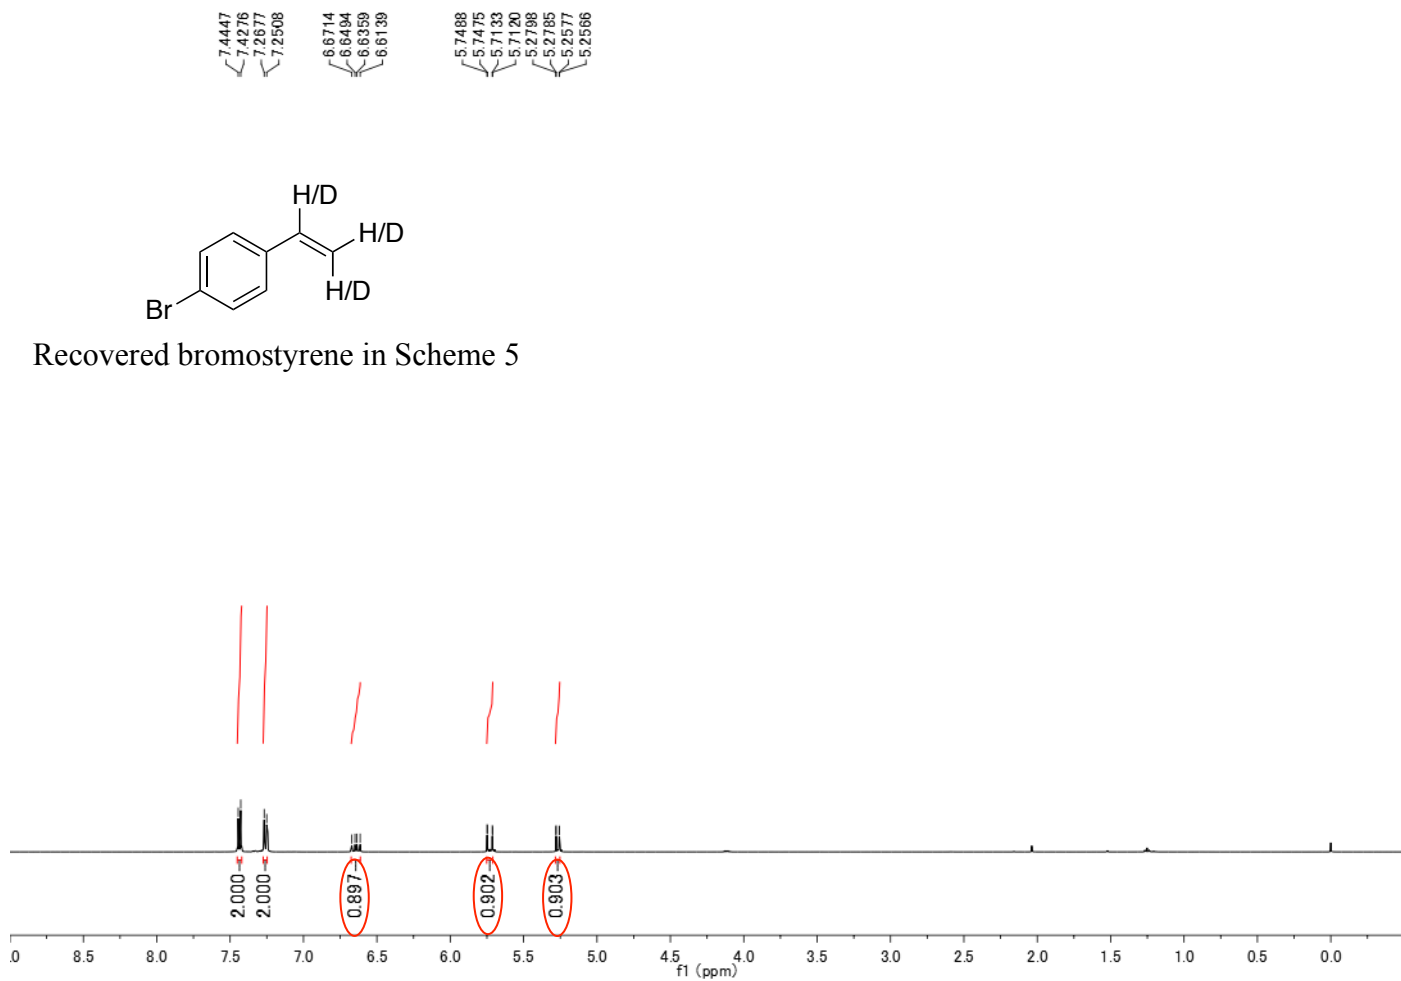

8.2895  
8.2836  
8.2841  
7.3703  
7.3547  
7.3448  
7.3402  
7.3019  
7.2868  
7.2735  
7.2710  
7.1477  
7.1444  
7.1410  
7.1327  
6.9992  
6.9533  
6.9470  
6.9396  
6.9339

4.2663  
4.2473

(Recovered in KIE experiment)

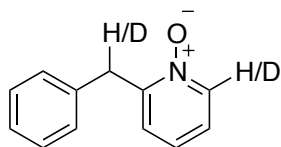

Recovered **1a-D** in Scheme 6

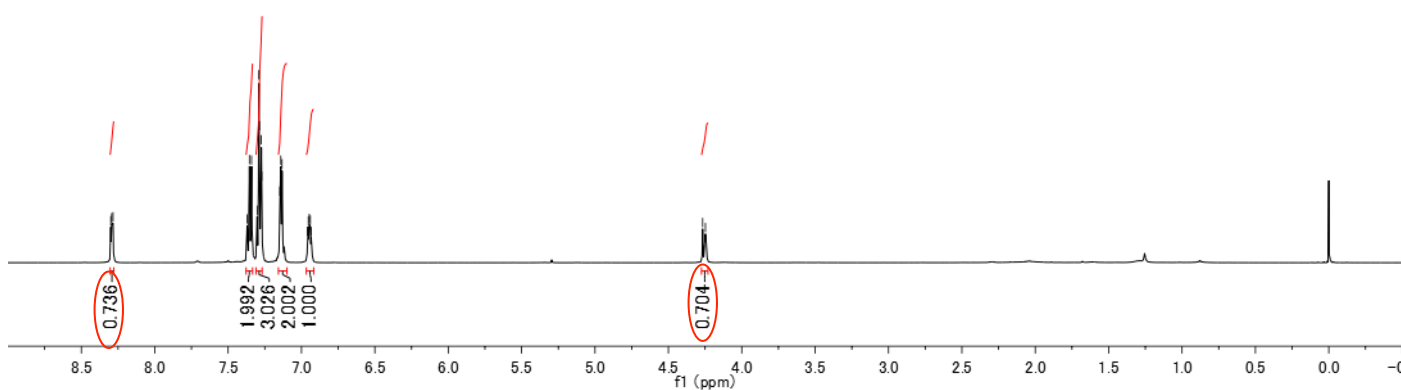

7.3532  
7.3378  
7.3274  
7.3236  
7.2859  
7.2832  
7.2714  
7.2680  
7.2529  
7.1942  
7.1905  
7.1786  
7.1747  
7.0563  
7.0405  
7.0248  
6.8407  
6.8362  
6.8310  
6.8249  
6.8204  
6.8153

4.2469  
4.2280  
4.1294  
4.1150  
4.1005  
4.0861

3.2492  
3.2349  
3.2207  
2.8627  
2.8485  
2.8342

1.2285  
1.2140  
1.1996

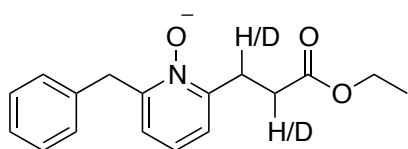

**3a-D** in Scheme6

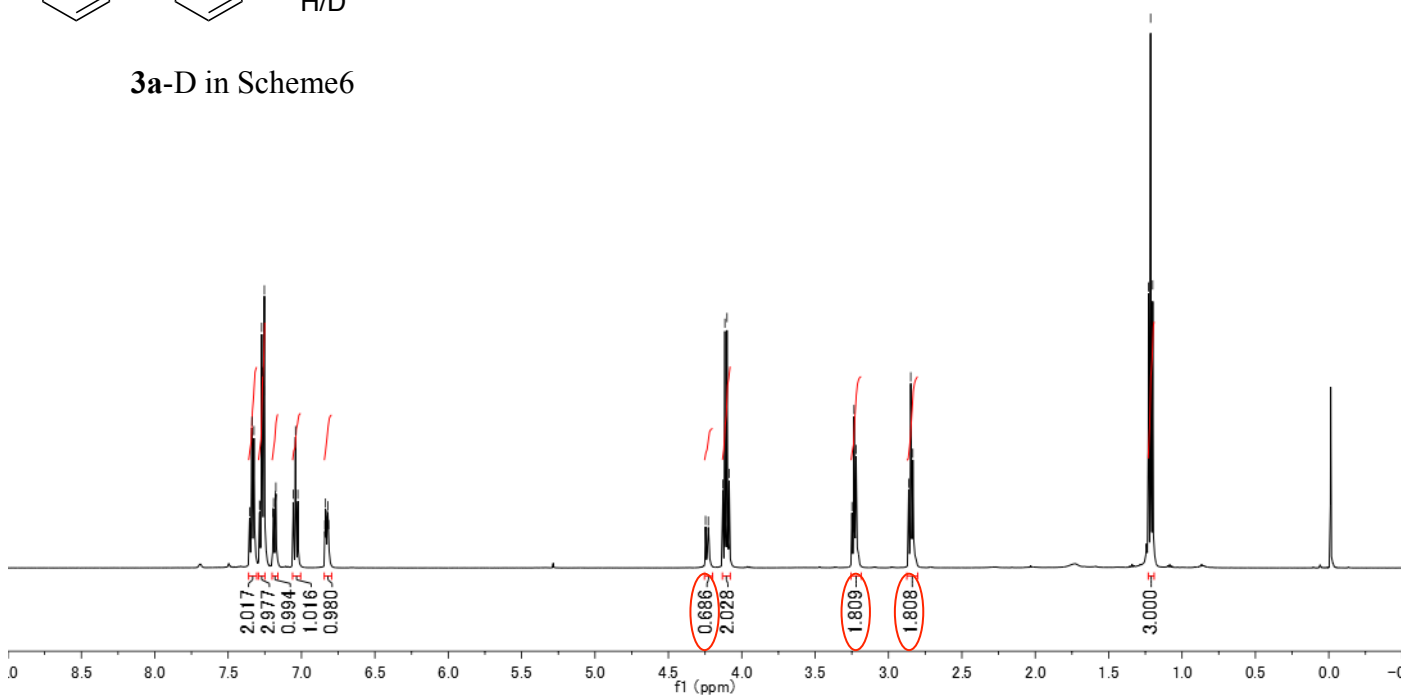

Supplement: c4qo00355a1.pdf [file c4qo00355a1.pdf]
